# Supplementary material for: SFRP1 is a possible candidate for epigenetic therapy in non-small cell lung cancer
Source: PubMed Central journal article supplement (PMC4989892; doi:10.1186/s12920-016-0196-3), 2016-08-12

**NM\_020436.2 SALL4**  
**COR= -8.93e-01 P= 2.18e-09**

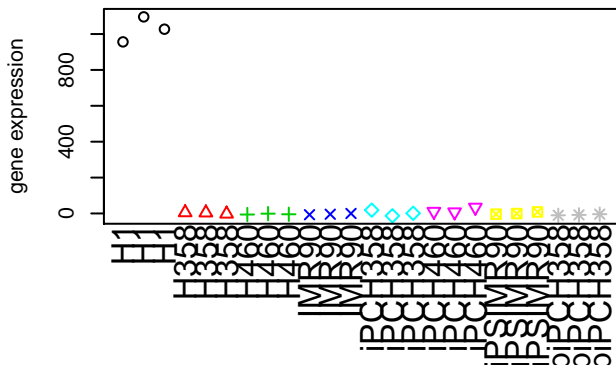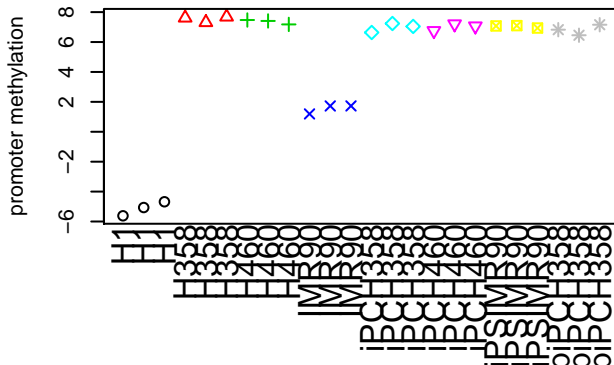

**NM\_002354.1 TACSTD1**  
**COR= -7.79e-01 P= 3.71e-06**

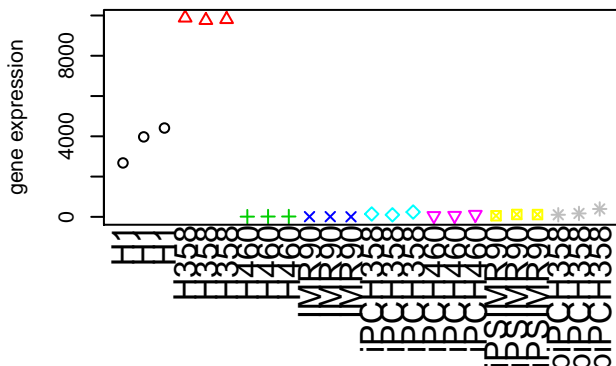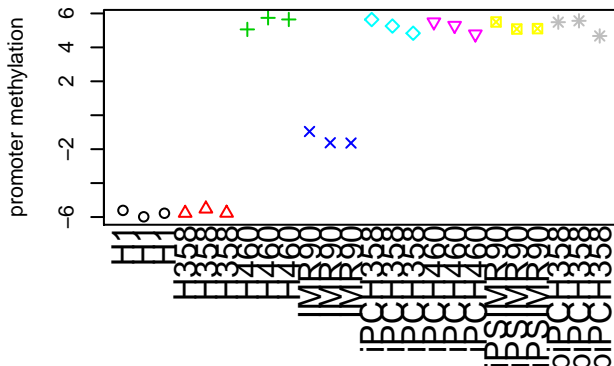

**NM\_001146.3 ANGPT1**  
**COR= -9.86e-02 P= 3.23e-01**

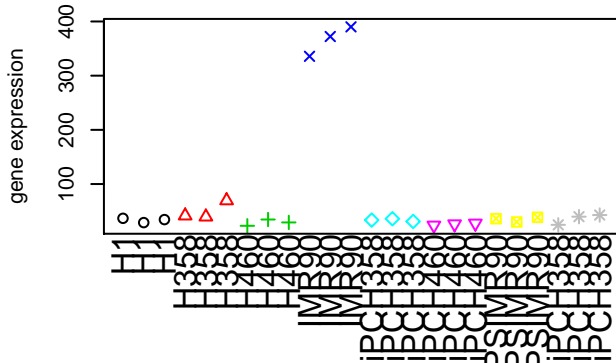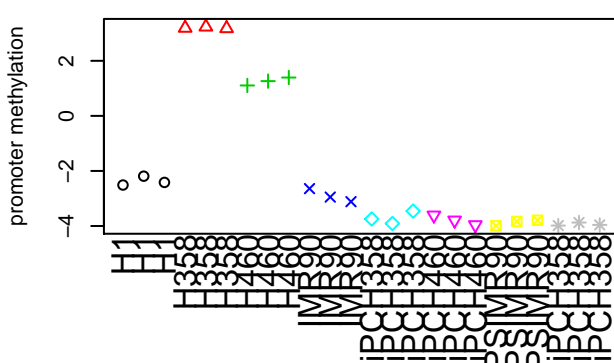

**NM\_002353.1 TACSTD2**  
**COR= -6.07e-01 P= 8.31e-04**

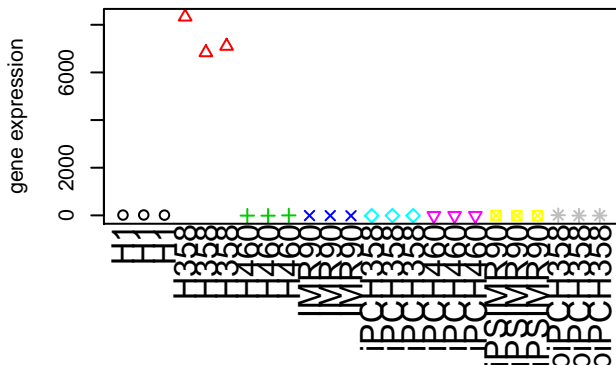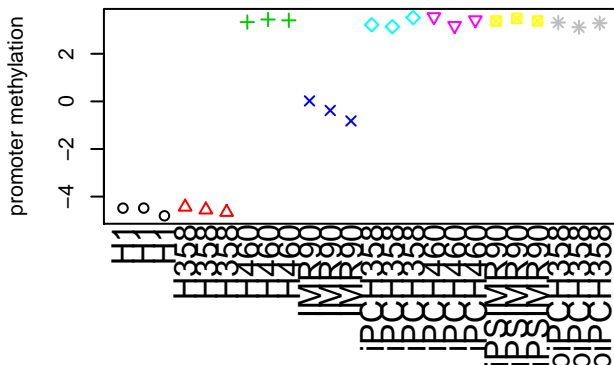

**NM\_032880.2 IGSF21**  
**COR= -2.97e-01 P= 7.95e-02**

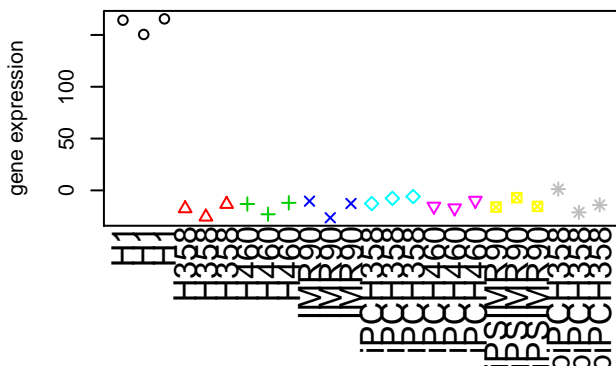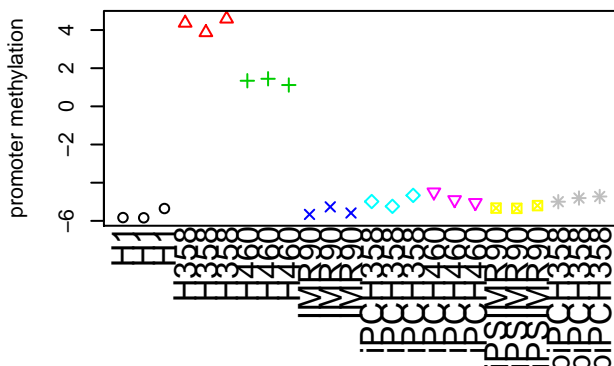

**NM\_004429.3 EFNB1**  
**COR= 4.59e-01 P= 1.21e-02**

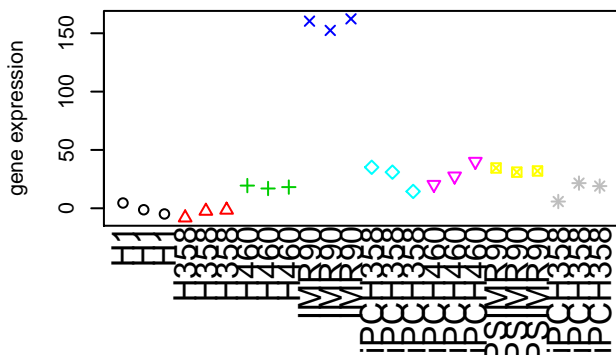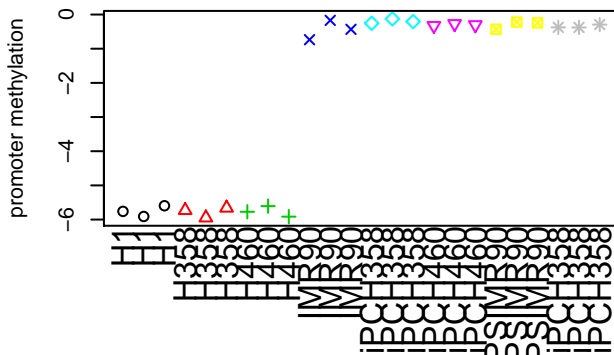

**NM\_177524.1 MEST**  
**COR= -8.94e-01 P= 1.97e-09**

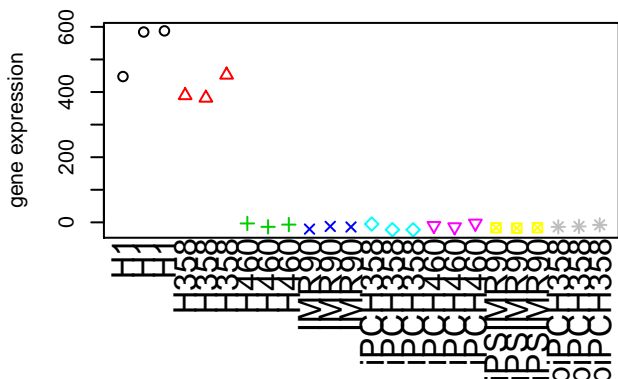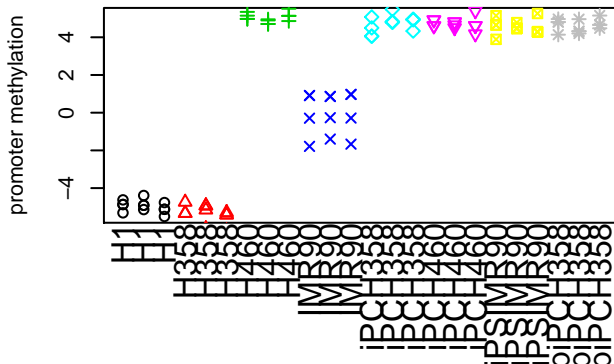

**NM\_013243.2 SCG3**  
**COR= -1.70e-01 P= 2.14e-01**

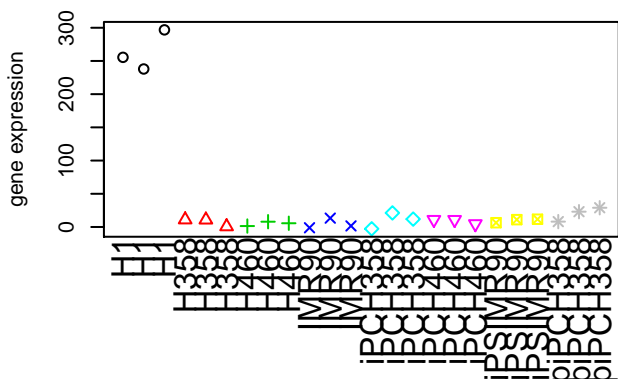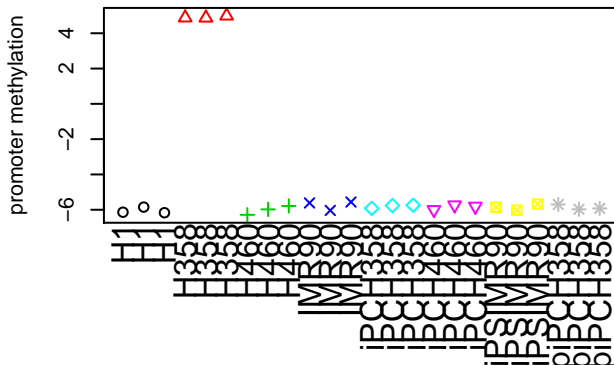

Supplement: 12920_2016_196_MOESM3_ESM.pdf [file 12920_2016_196_MOESM3_ESM.pdf]
