# Supplementary material for: SFRP1 is a possible candidate for epigenetic therapy in non-small cell lung cancer
Source: PubMed Central journal article supplement (PMC4989892; doi:10.1186/s12920-016-0196-3), 2016-08-12

**NM\_001992.2 F2R**  
**COR= -5.59e-01 P= 2.25e-03**

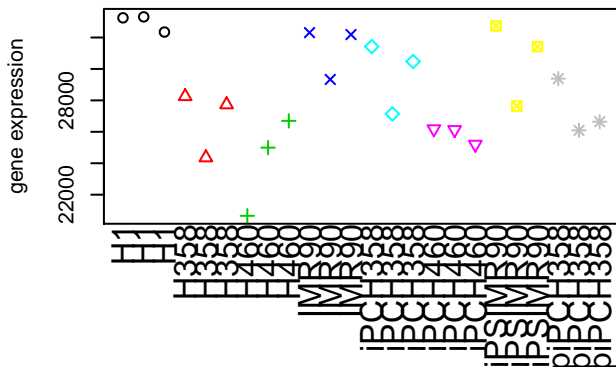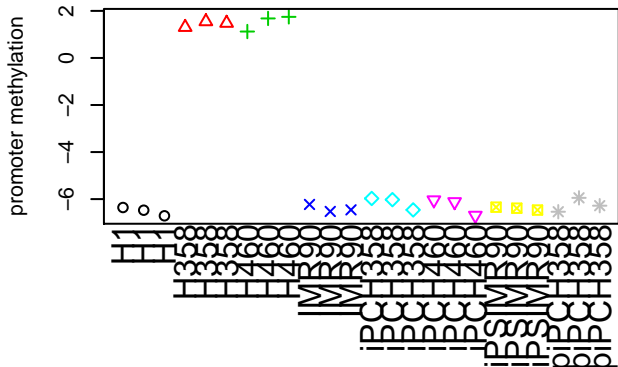

**NM\_015881.5 DKK3**  
**COR= -3.60e-01 P= 4.22e-02**

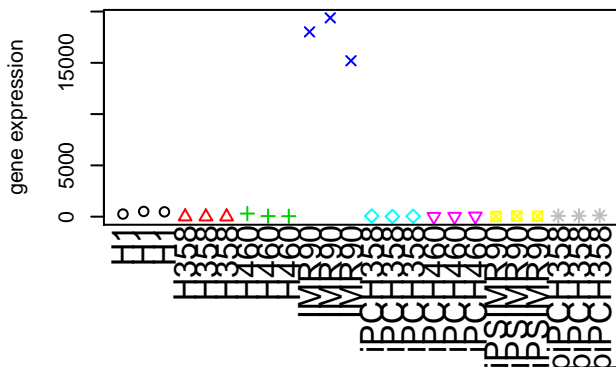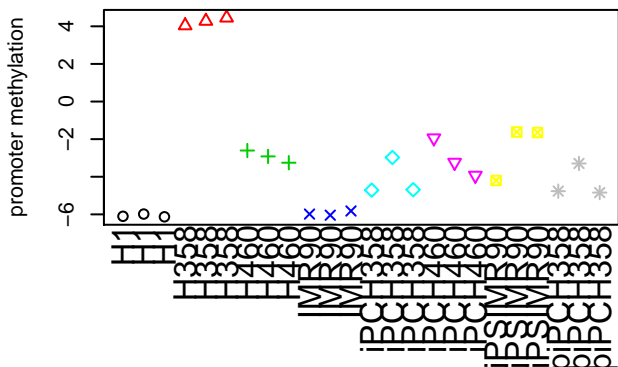

**NM\_003012.3 SFRP1**  
**COR= -7.59e-01 P= 8.44e-06**

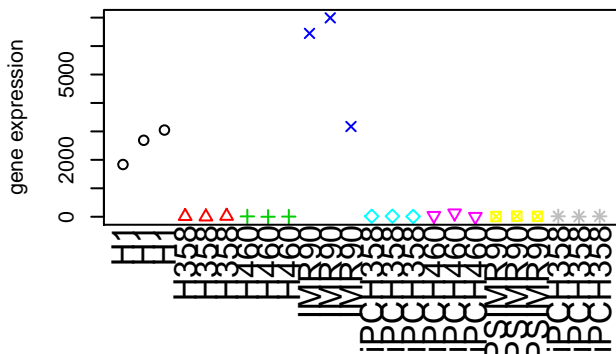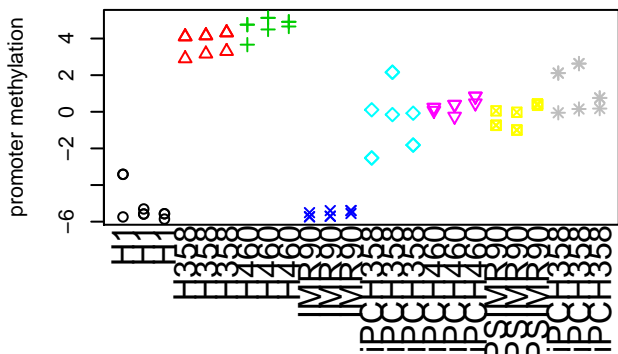

**NM\_213606.1 SLC16A12**  
**COR= -2.09e-01 P= 1.63e-01**

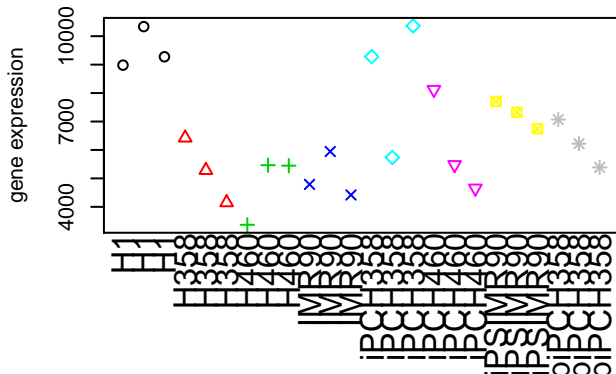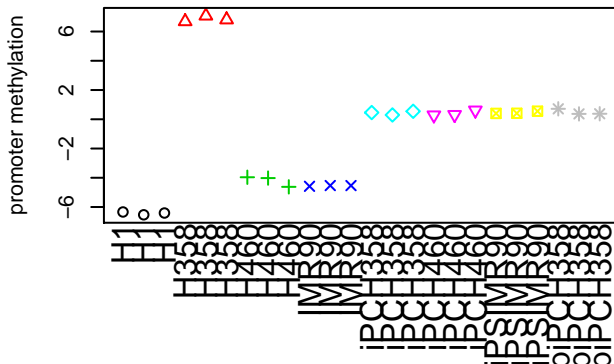

**NM\_019102.2 HOXA5**  
**COR= -5.36e-01 P= 3.49e-03**

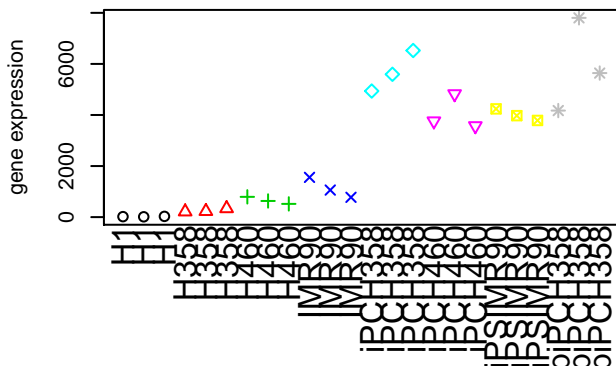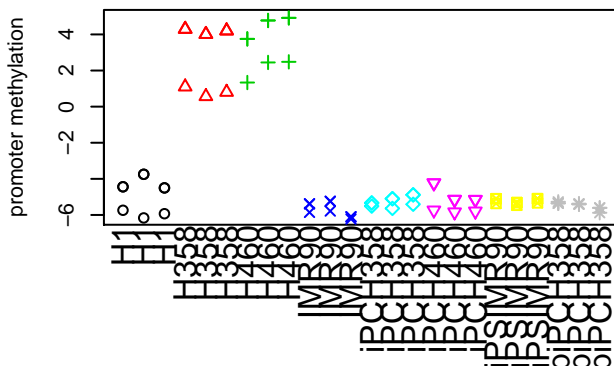

**NM\_004321.4 KIF1A**  
**COR= -3.44e-01 P= 4.97e-02**

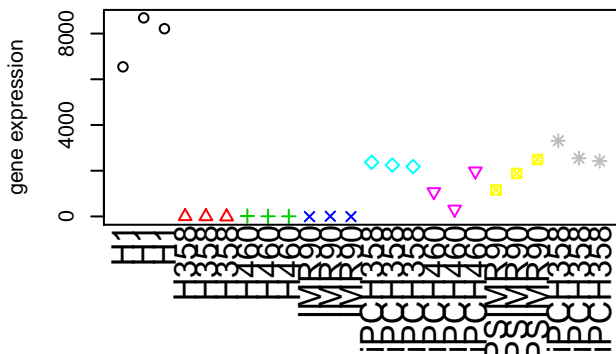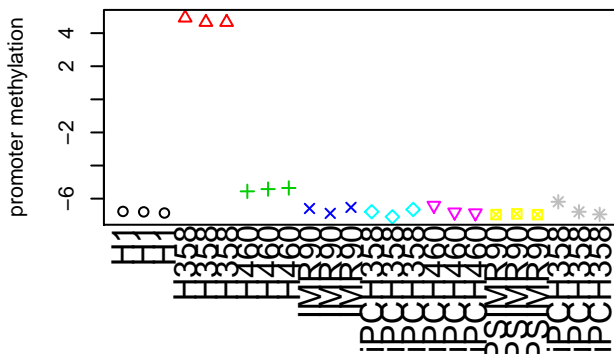

**NM\_004893.2 H2AFY**  
**COR= 6.36e-01 P= 4.14e-04**

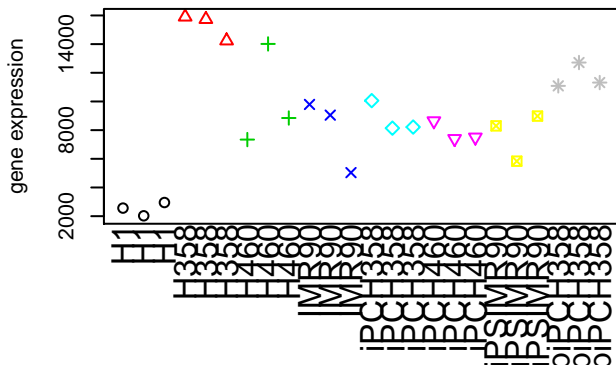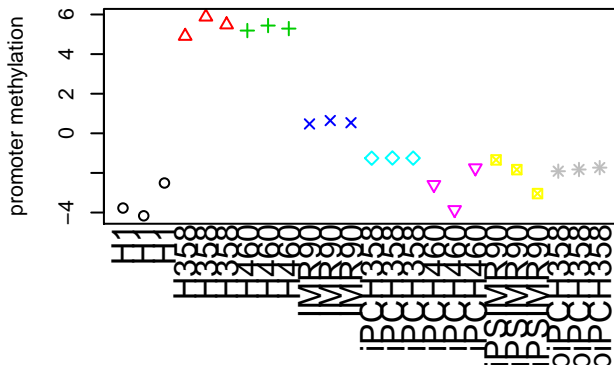

**NM\_005176.4 ATP5G2**  
**COR= 4.07e-01 P= 2.41e-02**

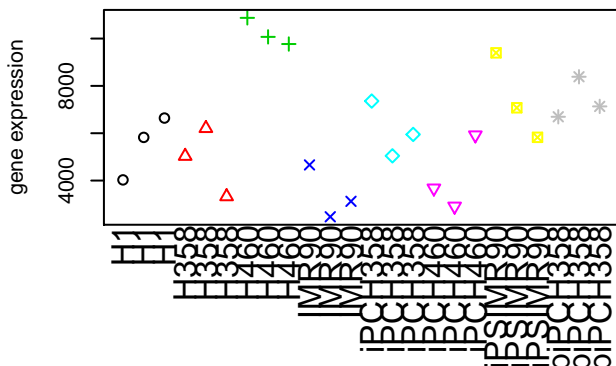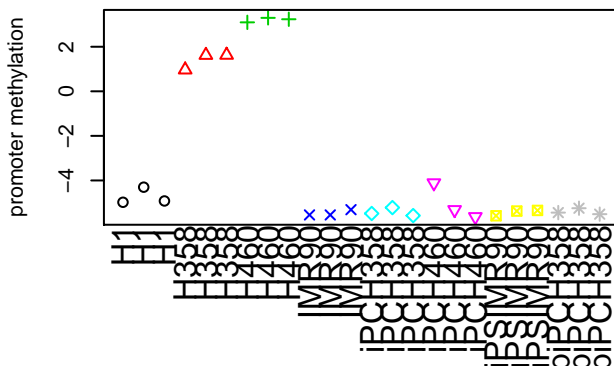

**NM\_014220.2 TM4SF1**  
**COR= -7.96e-01 P= 1.61e-06**

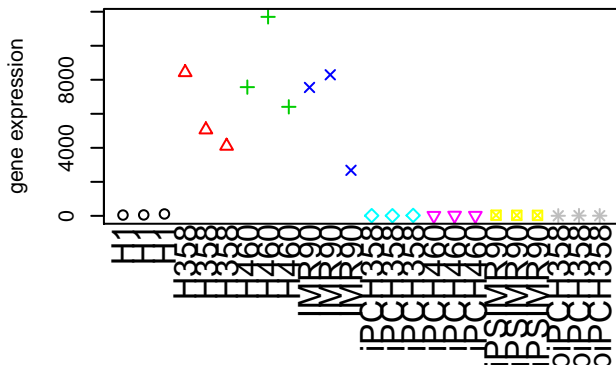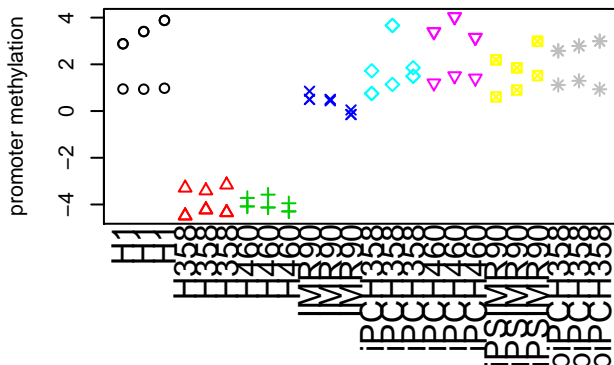

**NM\_201525.1 GPR56**  
**COR= -8.40e-01 P= 1.42e-07**

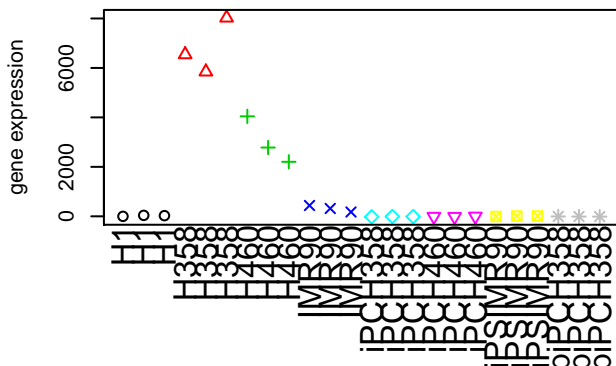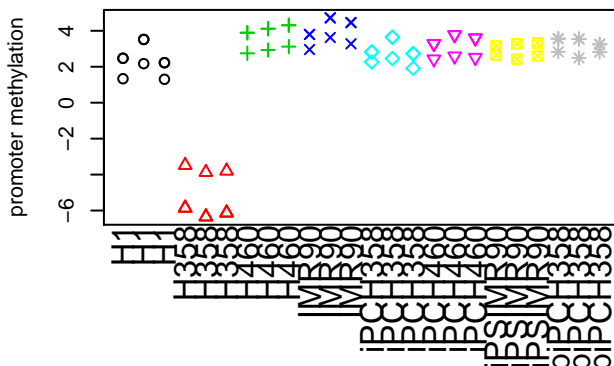

**NM\_005980.2 S100P**  
**COR= -8.23e-01 P= 3.99e-07**

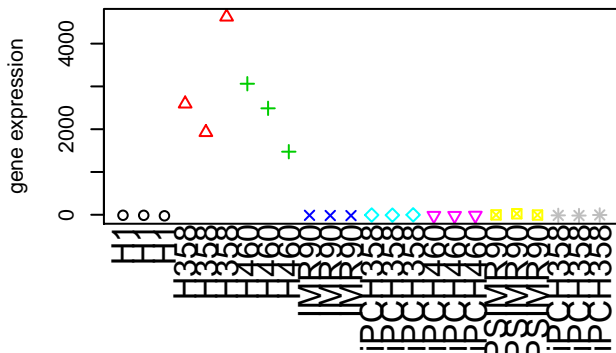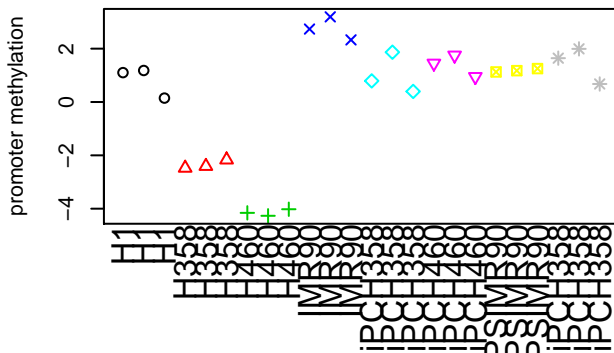

Supplement: 12920_2016_196_MOESM4_ESM.pdf [file 12920_2016_196_MOESM4_ESM.pdf]
