# Supplementary material for: SFRP1 is a possible candidate for epigenetic therapy in non-small cell lung cancer
Source: PubMed Central journal article supplement (PMC4989892; doi:10.1186/s12920-016-0196-3), 2016-08-12

**NM\_021102.2 SPINT2**  
**COR= -3.71e-01 P= 3.72e-02**

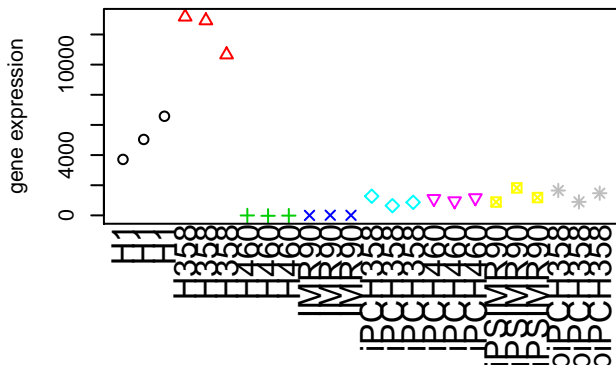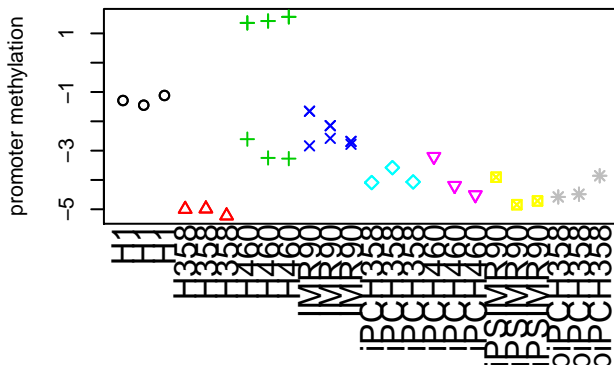

**NM\_002354.1 TACSTD1**  
**COR= -7.79e-01 P= 3.71e-06**

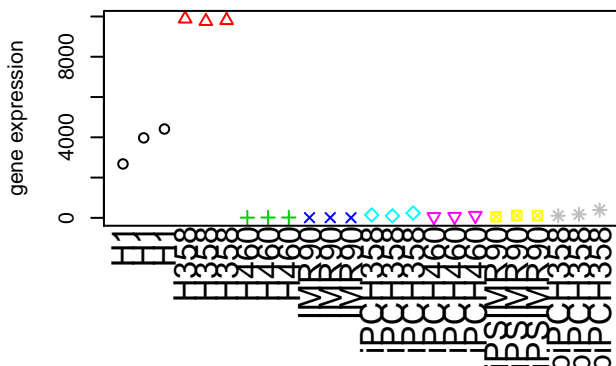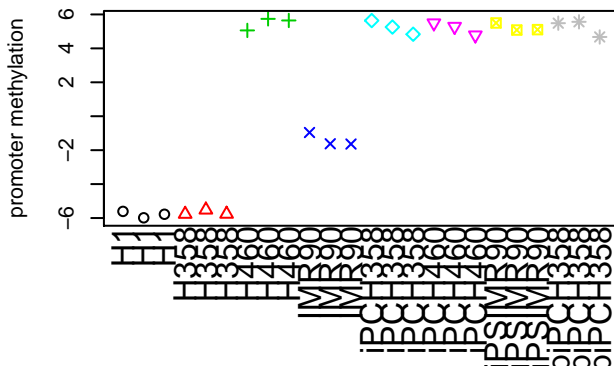

**NM\_004360.2 CDH1**  
**COR= -4.19e-01 P= 2.07e-02**

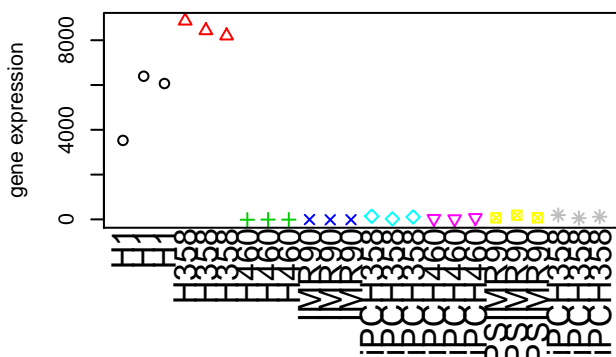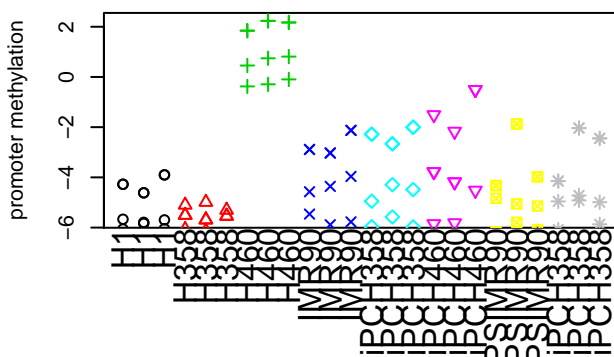

**NM\_002353.1 TACSTD2**  
**COR= -6.07e-01 P= 8.31e-04**

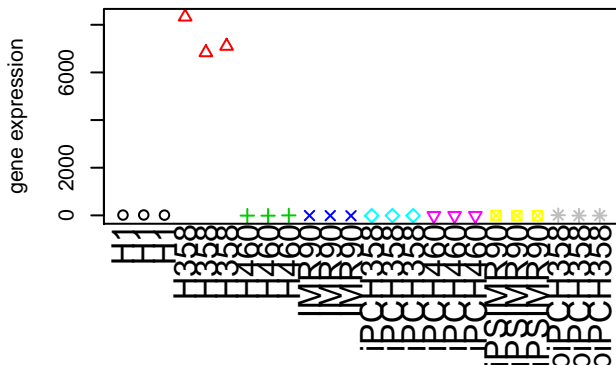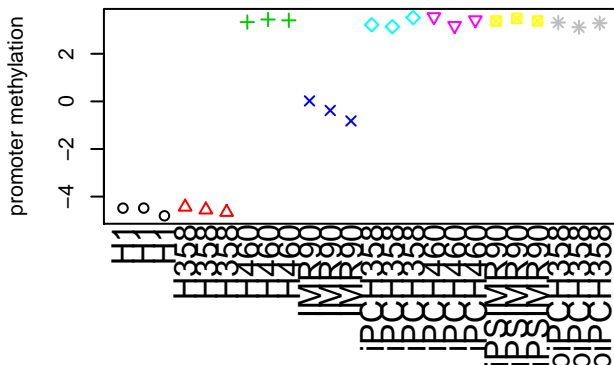

**NM\_005562.1 LAMC2**  
**COR= -7.07e-01 P= 5.59e-05**

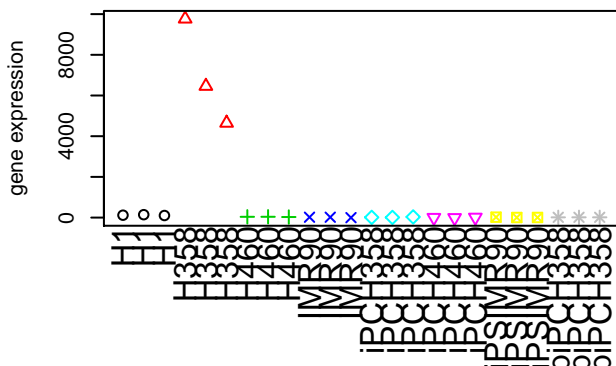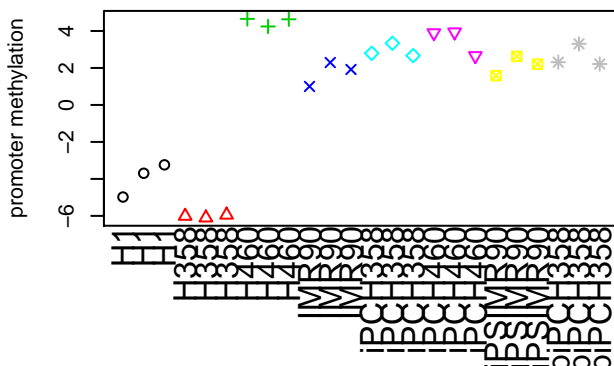

**NM\_145899.1 HMGA1**  
**COR= -8.23e-01 P= 4.03e-07**

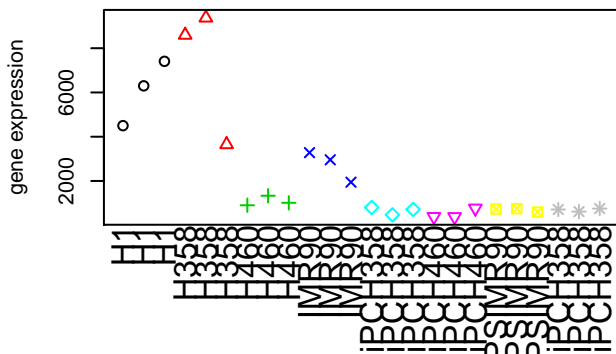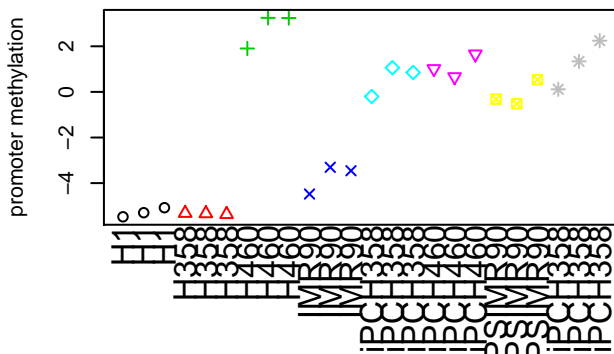



NM\_005218.3 DEFB1  
COR= 6.08e-01 P= 8.18e-04

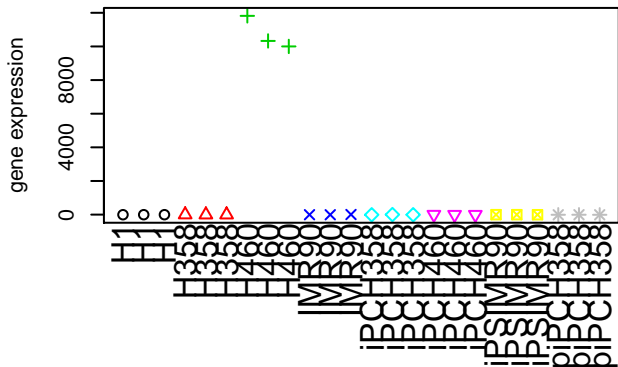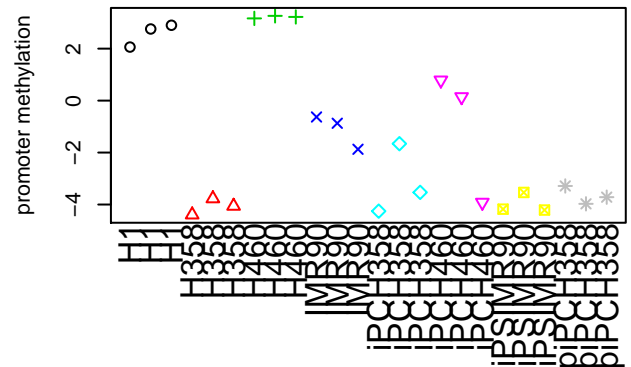

**NM\_002727.2 SRGN**  
**COR= -9.49e-01 P= 7.88e-13**

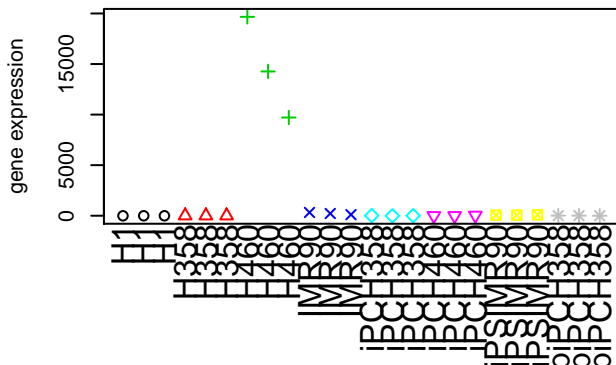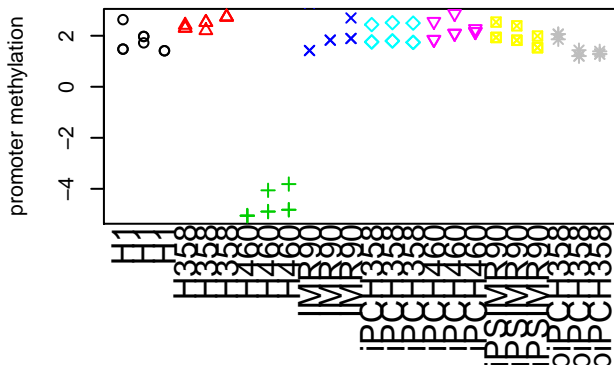

**NM\_004181.3 UCHL1**  
**COR= -4.87e-01 P= 7.86e-03**

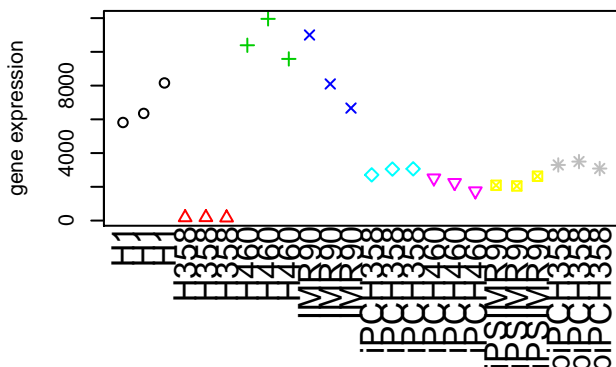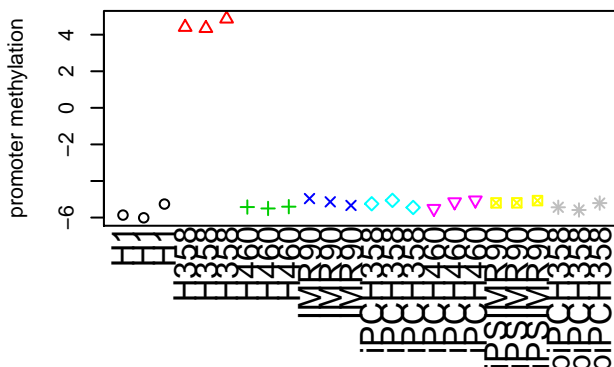

**NM\_000691.3 ALDH3A1**  
**COR= -5.88e-01 P= 1.25e-03**

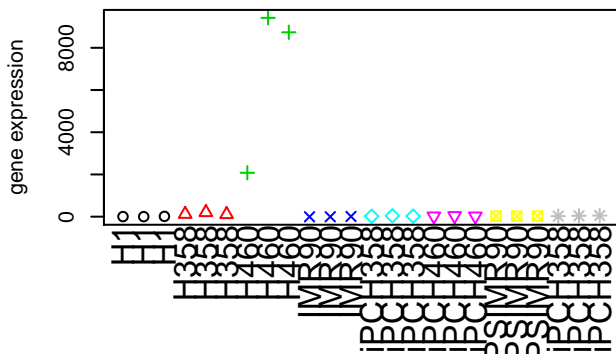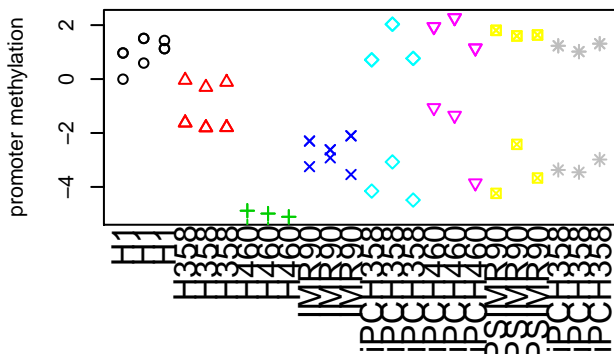

**NM\_012307.2 EPB41L3**  
**COR= -2.39e-01 P= 1.30e-01**

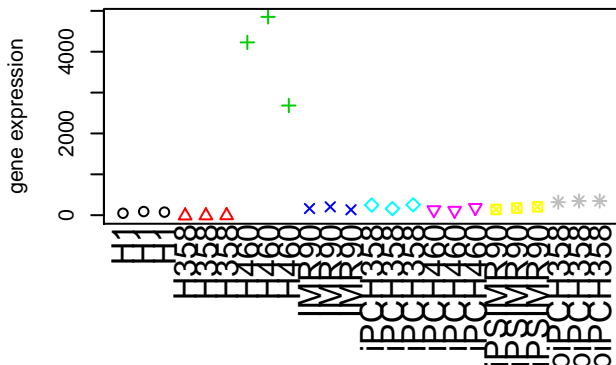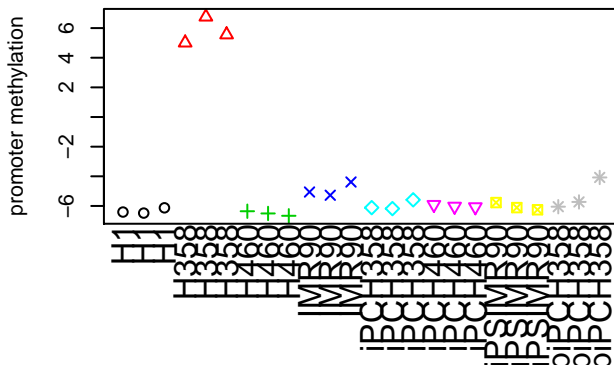

**NM\_021136.2 RTN1**  
**COR= -3.62e-01 P= 4.10e-02**

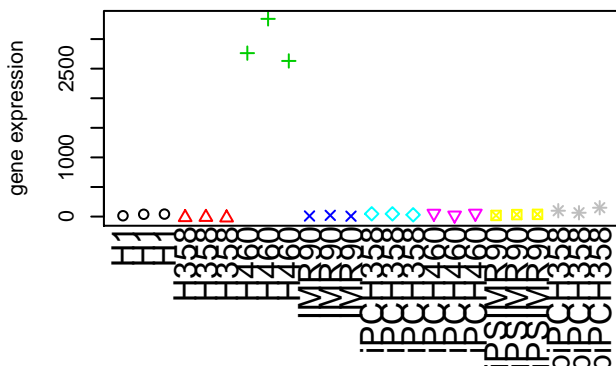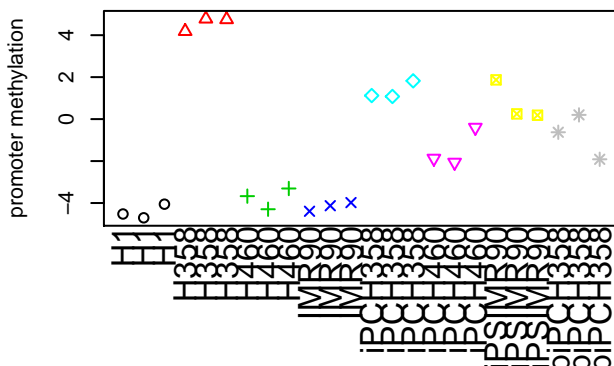

**NM\_005559.2 LAMA1**  
**COR= -1.92e-01 P= 1.84e-01**

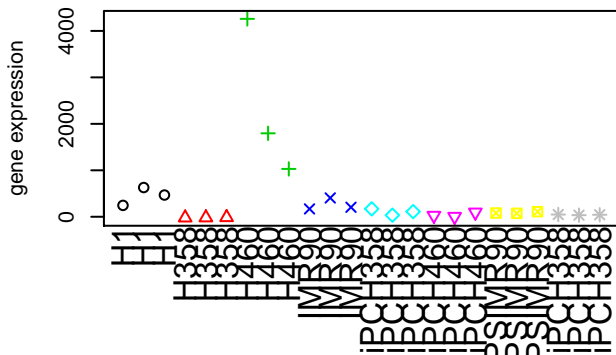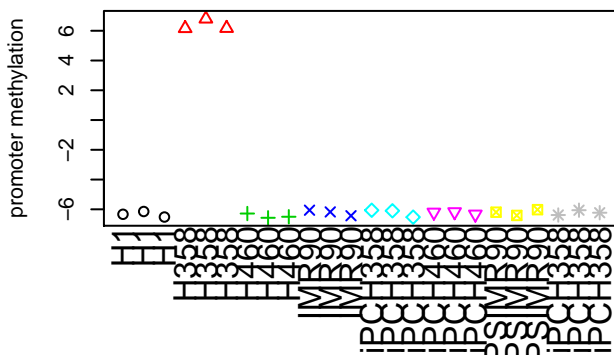

Supplement: 12920_2016_196_MOESM5_ESM.pdf [file 12920_2016_196_MOESM5_ESM.pdf]
