# Supplementary material for: SFRP1 is a possible candidate for epigenetic therapy in non-small cell lung cancer
Source: PubMed Central journal article supplement (PMC4989892; doi:10.1186/s12920-016-0196-3), 2016-08-12

**(a) PC3**

**COR= -8.31e-01 P= 2.48e-07**

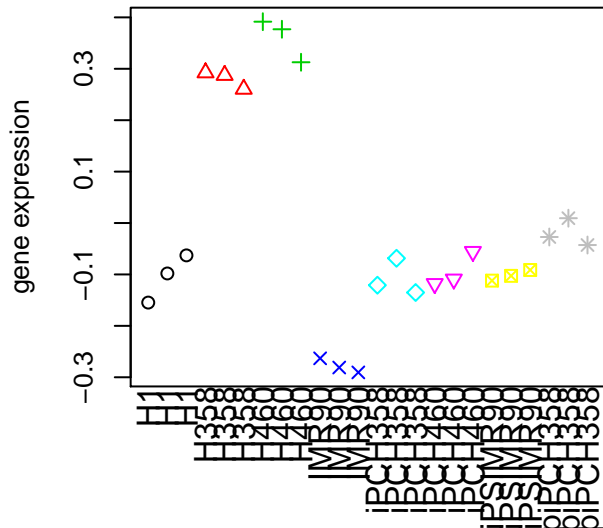

**(b)**

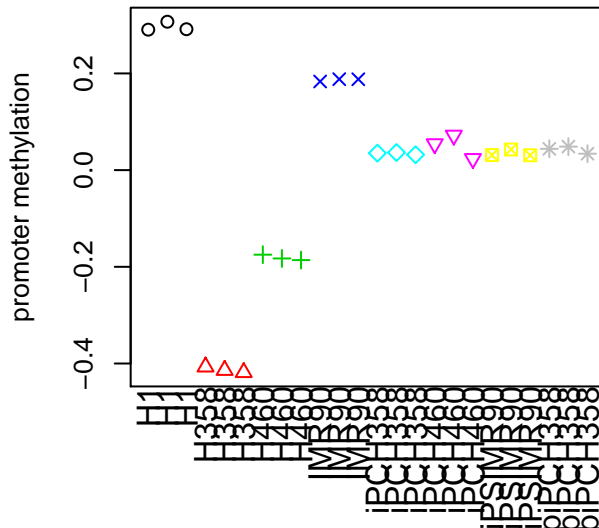

**(c) PC4**

**COR= 8.39e-01 P= 1.48e-07**

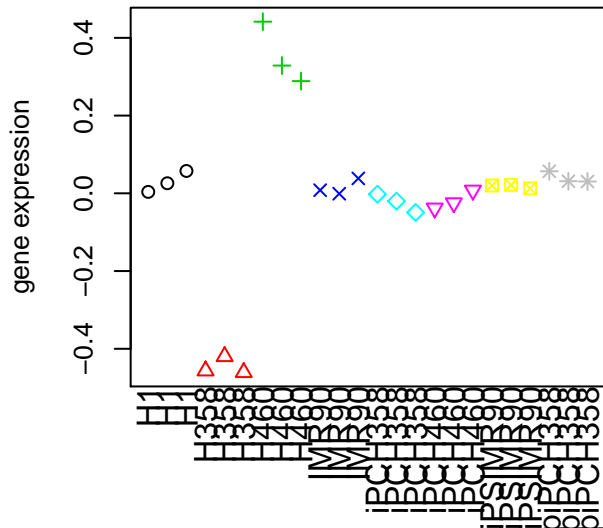

**(d)**

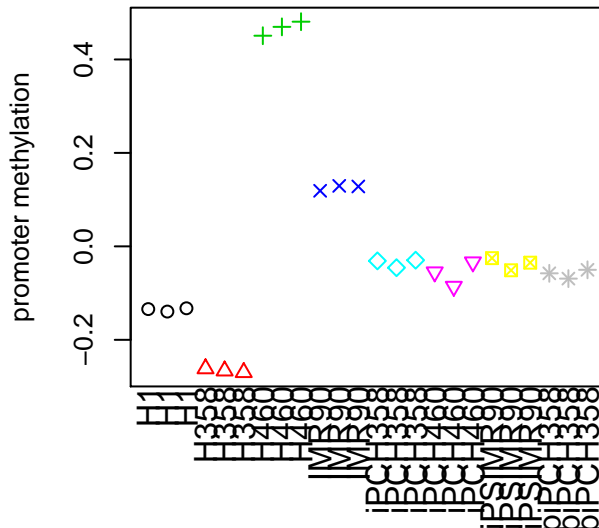

Supplement: 12920_2016_196_MOESM1_ESM.pdf [file 12920_2016_196_MOESM1_ESM.pdf]
