# Supplementary material for: SFRP1 is a possible candidate for epigenetic therapy in non-small cell lung cancer
Source: PubMed Central journal article supplement (PMC4989892; doi:10.1186/s12920-016-0196-3), 2016-08-12
Supplement: 12920_2016_196_MOESM2_ESM.pdf [file 12920_2016_196_MOESM2_ESM.pdf]

### Cluster Dendrogram

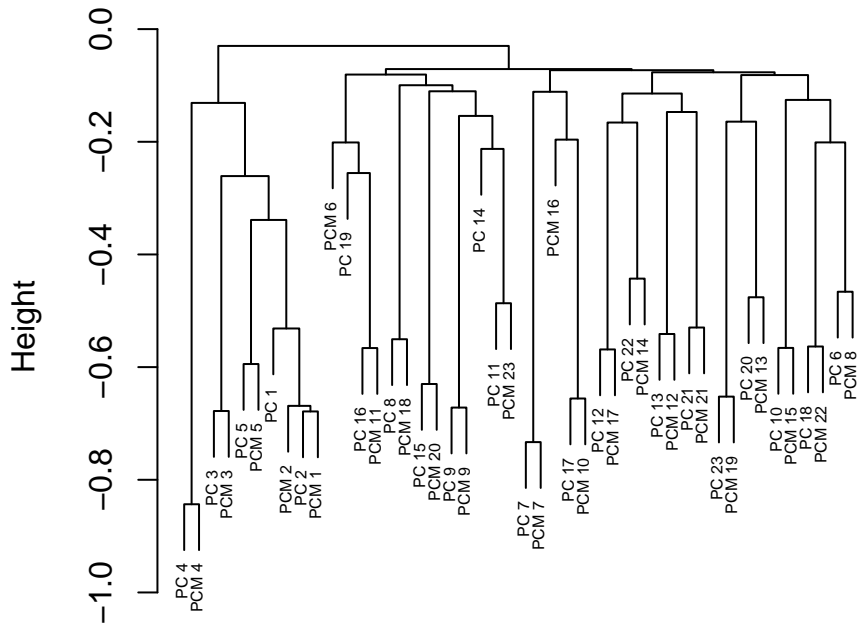

as.dist(-abs(cor(Z)))  
before re-labeling

### Cluster Dendrogram

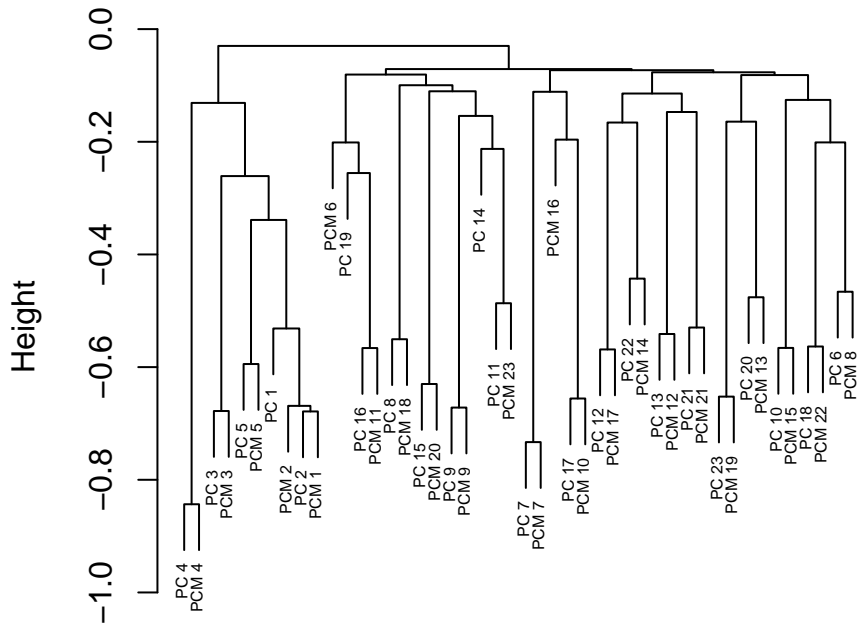

as.dist(-abs(cor(Z)))  
after re-labeling

### Cluster Dendrogram

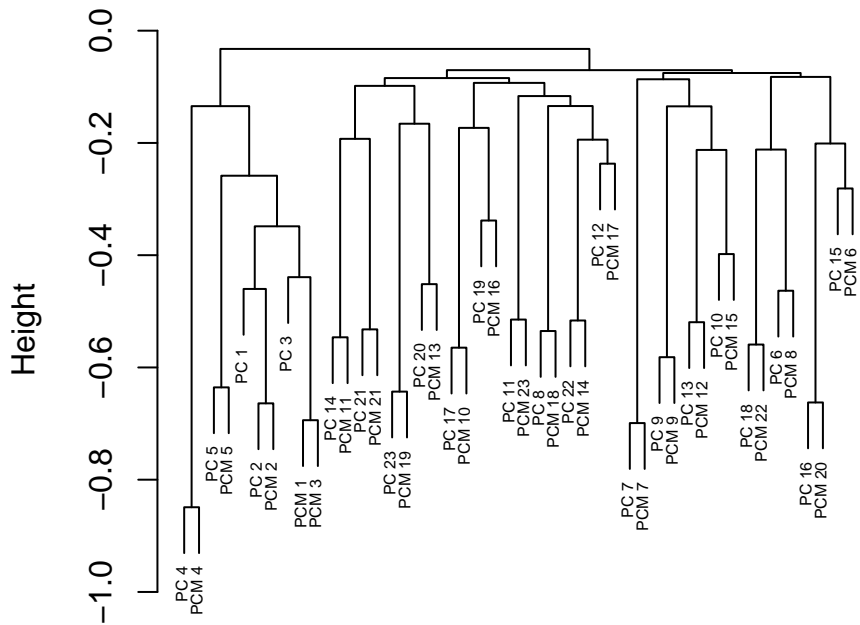

as.dist(-abs(cor(Z)))  
before re-labeling

### Cluster Dendrogram

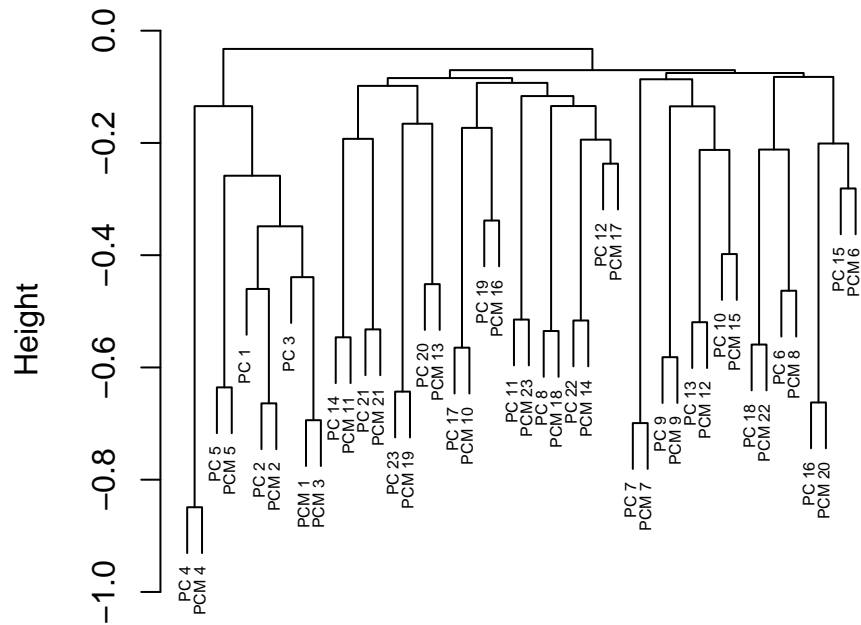

as.dist(-abs(cor(Z)))  
after re-labeling

### Cluster Dendrogram

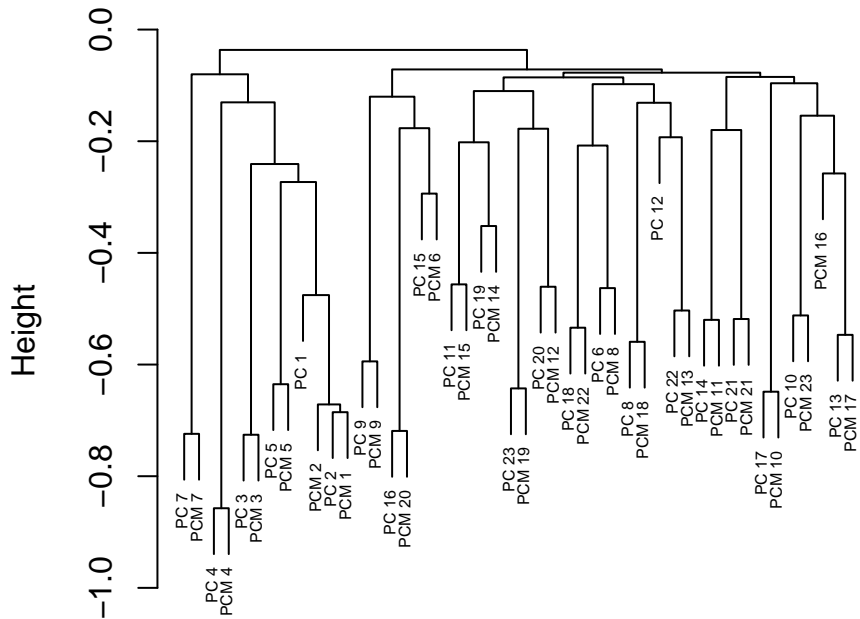

as.dist(-abs(cor(Z)))  
before re-labeling

### Cluster Dendrogram

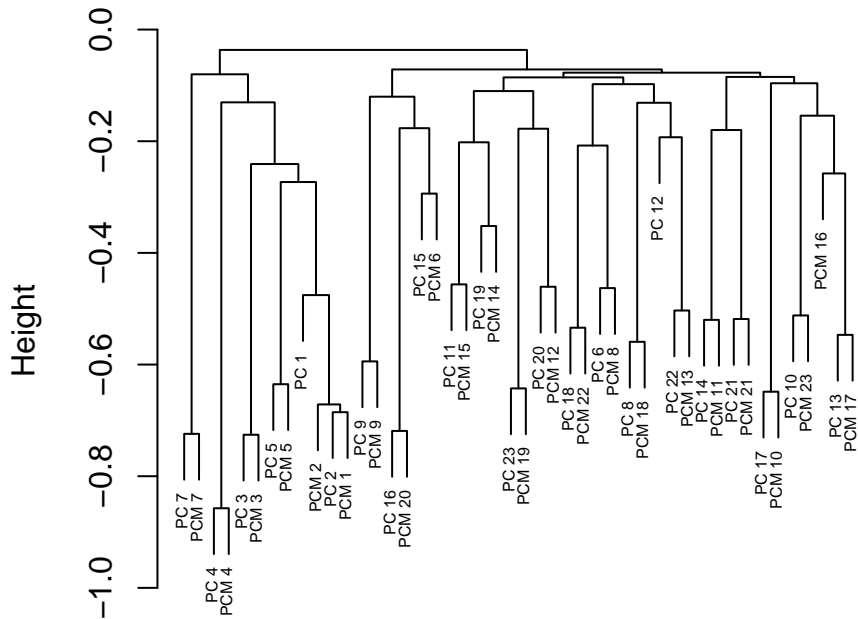

as.dist(-abs(cor(Z)))  
after re-labeling

### Cluster Dendrogram

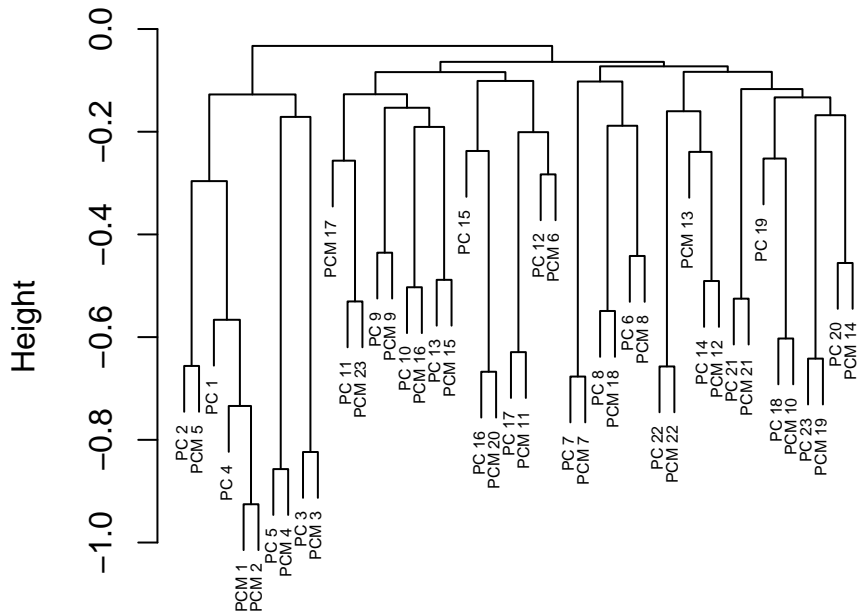

as.dist(-abs(cor(Z)))  
before re-labeling

### Cluster Dendrogram

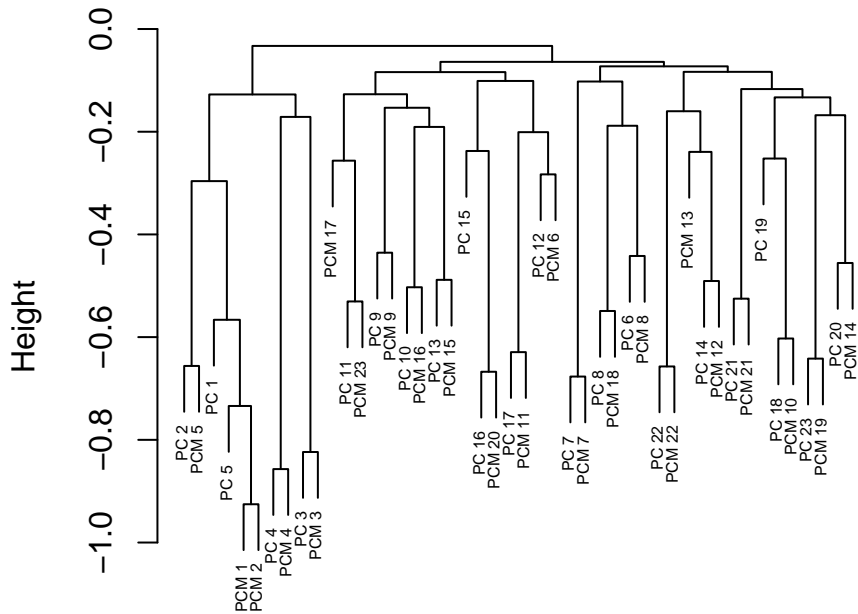

as.dist(-abs(cor(Z)))  
after re-labeling

### Cluster Dendrogram

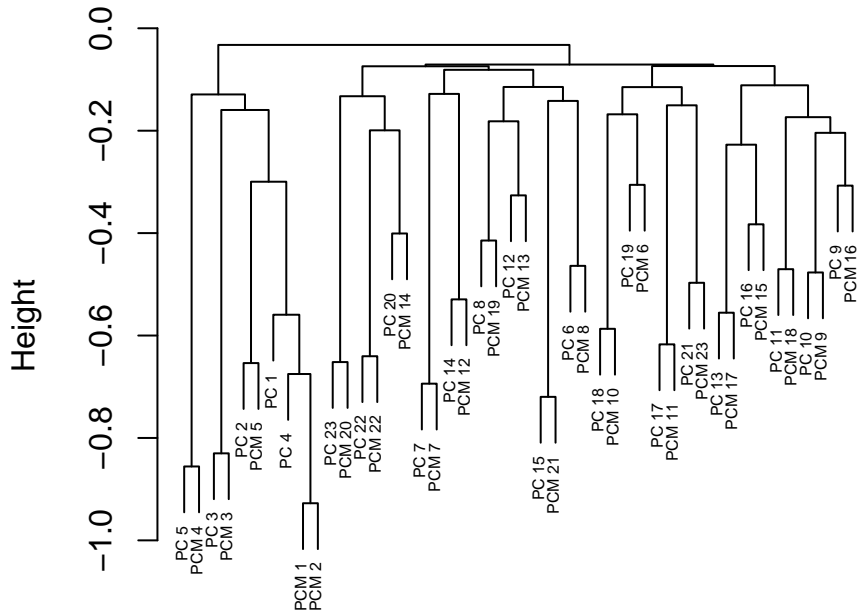

as.dist(-abs(cor(Z)))  
before re-labeling

### Cluster Dendrogram

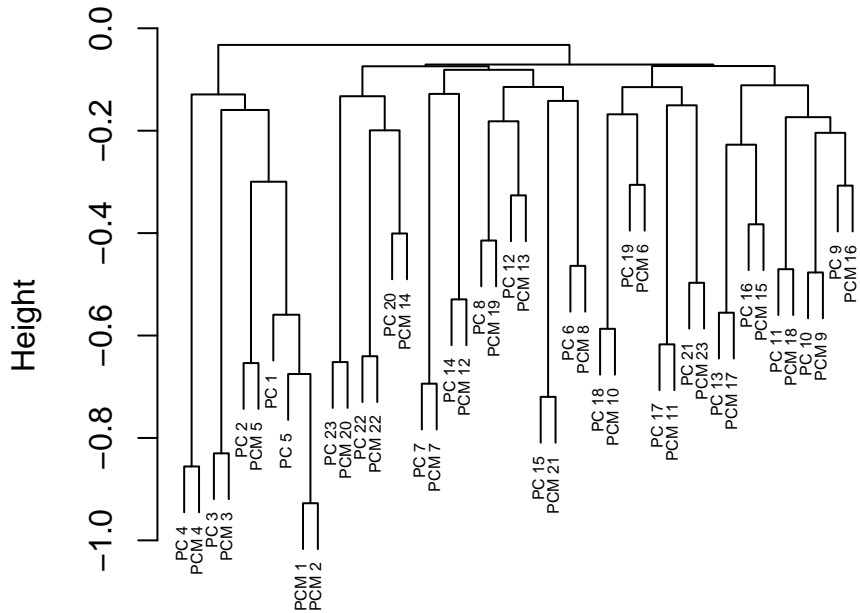

as.dist(-abs(cor(Z)))  
after re-labeling

### Cluster Dendrogram

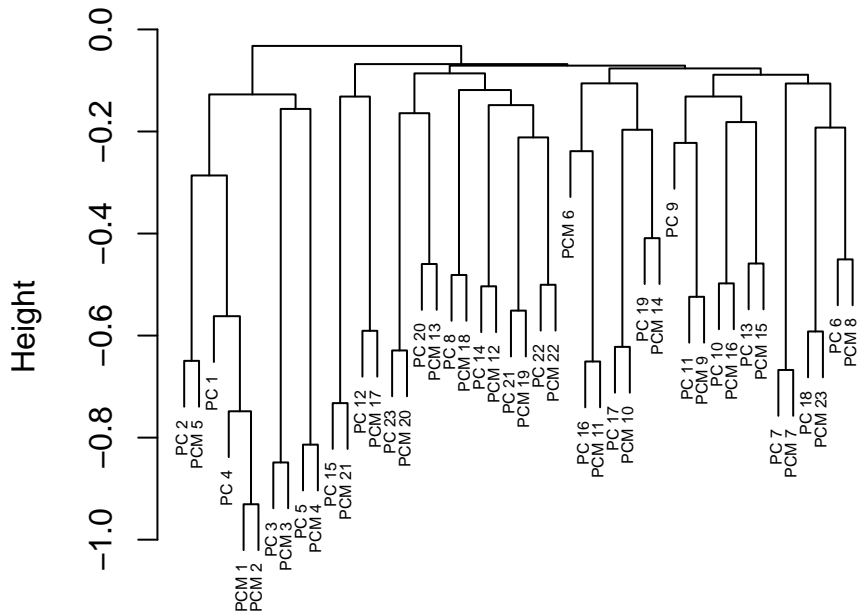

as.dist(-abs(cor(Z)))  
before re-labeling

### Cluster Dendrogram

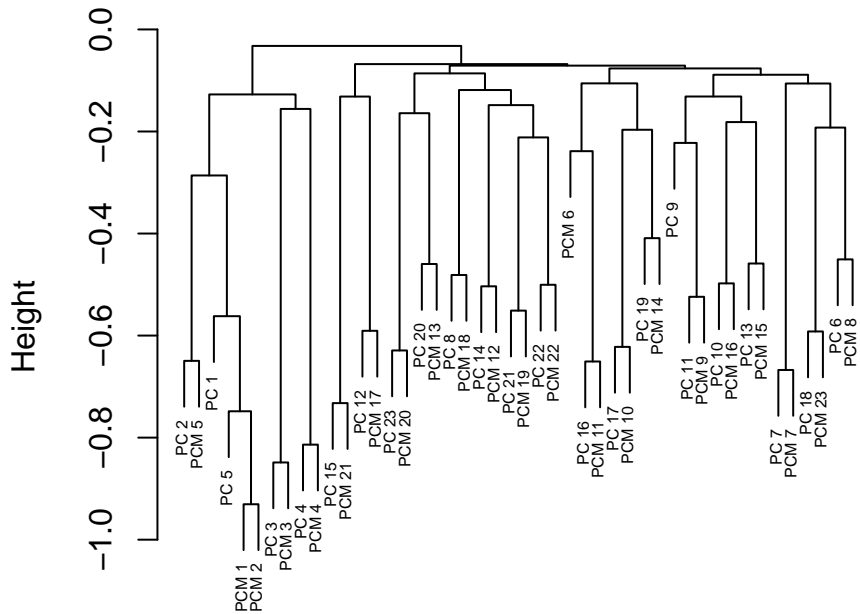

as.dist(-abs(cor(Z)))  
after re-labeling

### Cluster Dendrogram

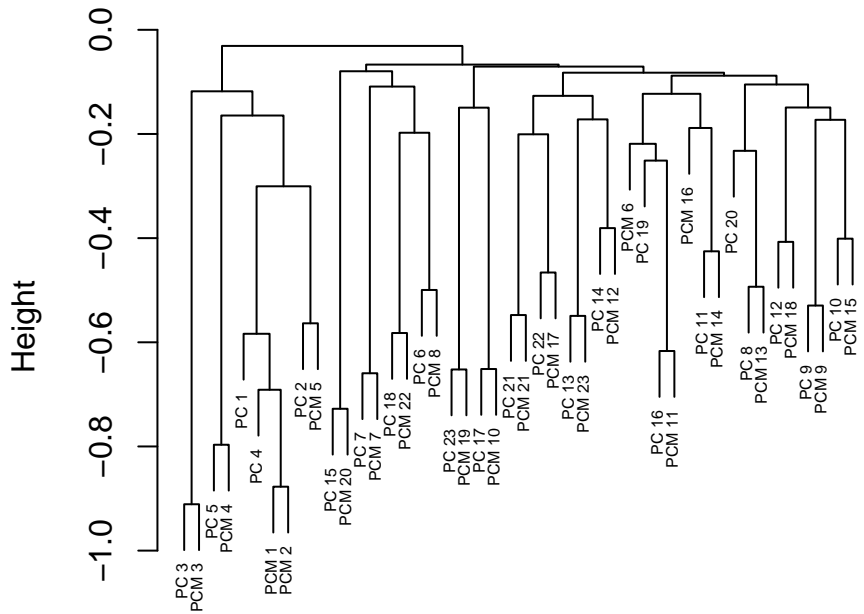

as.dist(-abs(cor(Z)))  
before re-labeling

### Cluster Dendrogram

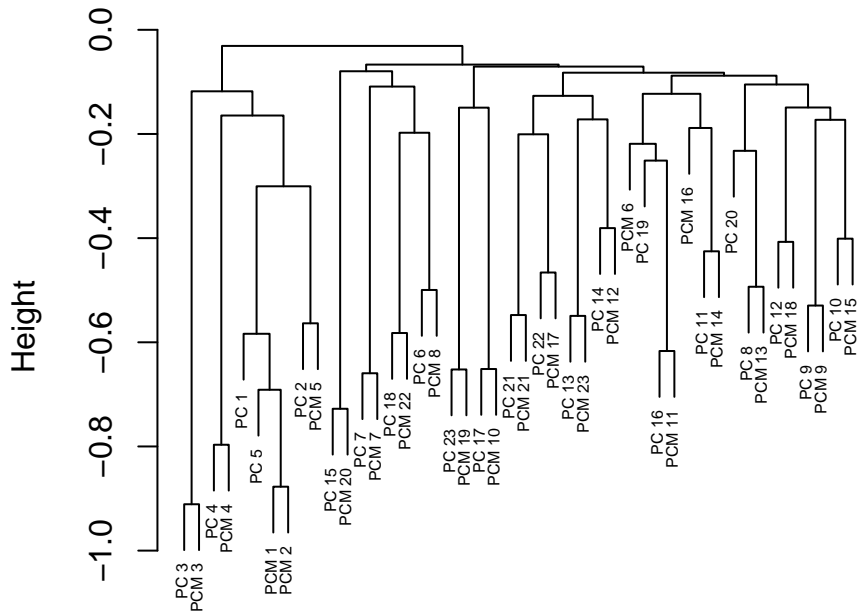

as.dist(-abs(cor(Z)))  
after re-labeling

### Cluster Dendrogram

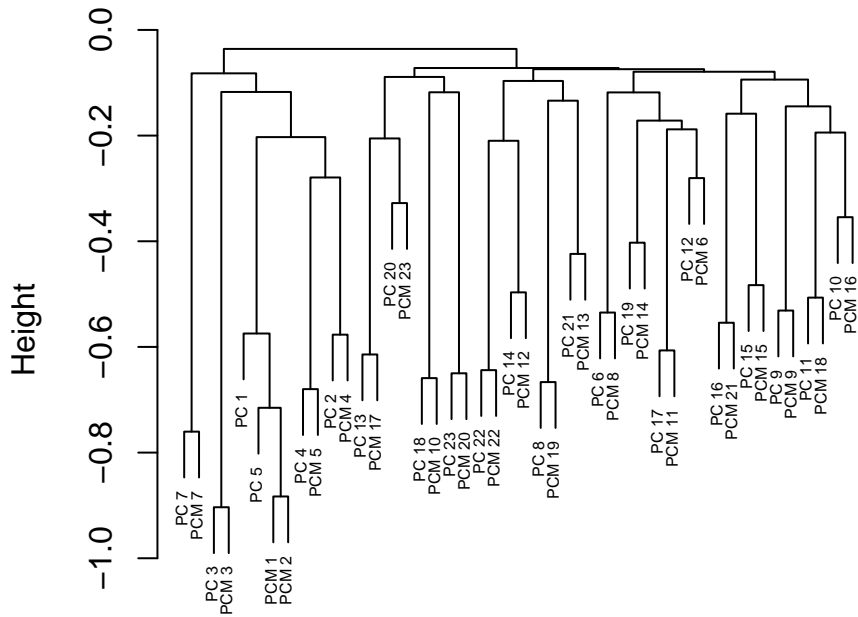

as.dist(-abs(cor(Z)))  
before re-labeling

### Cluster Dendrogram

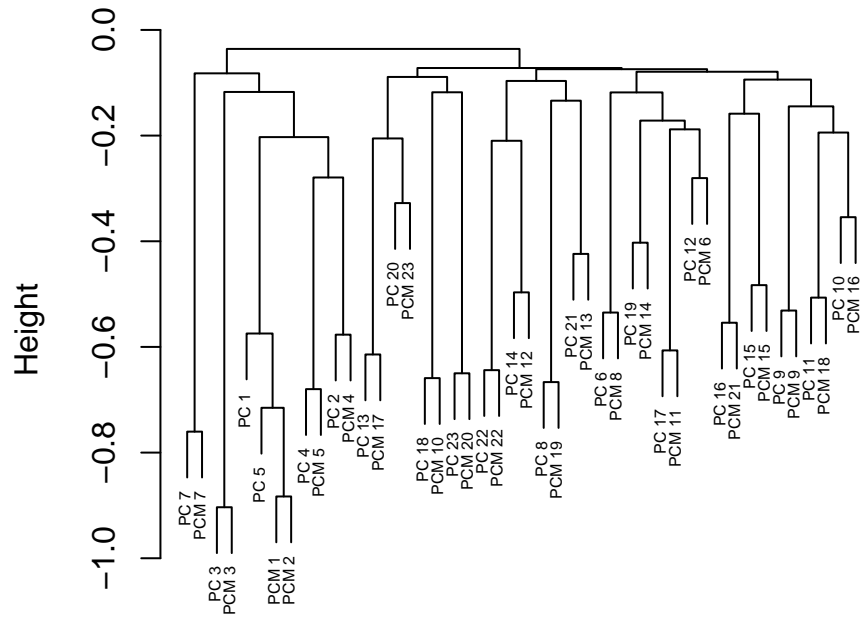

as.dist(-abs(cor(Z)))  
after re-labeling



### Cluster Dendrogram

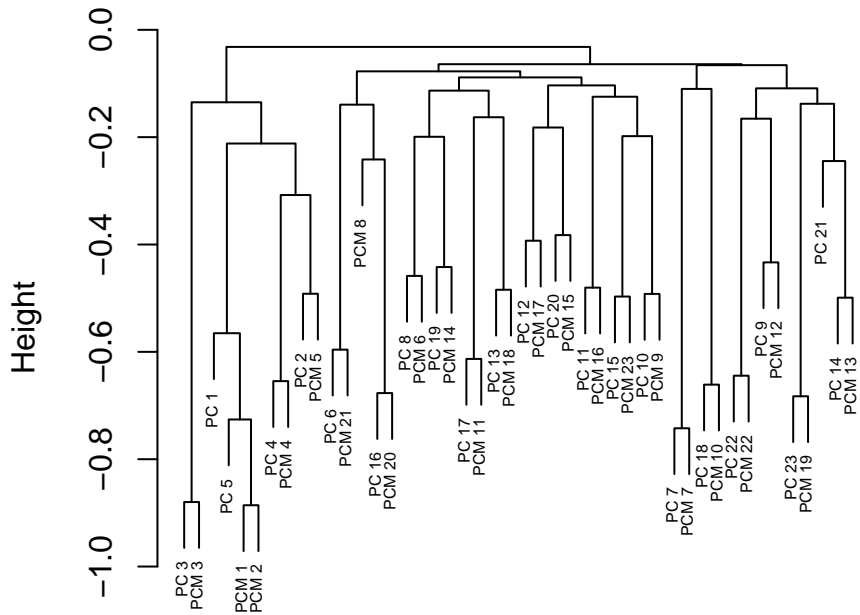

as.dist(-abs(cor(Z)))  
before re-labeling

### Cluster Dendrogram

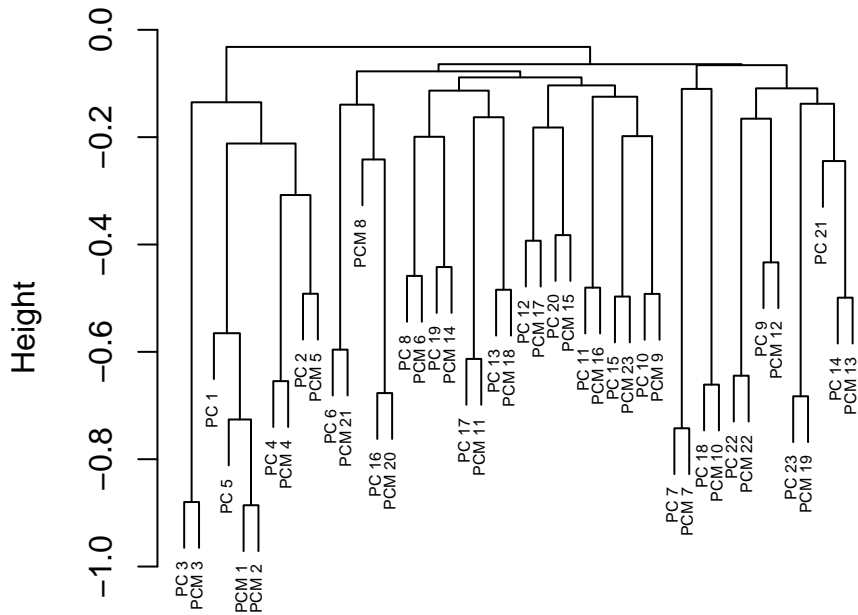

as.dist(-abs(cor(Z)))  
after re-labeling

### Cluster Dendrogram

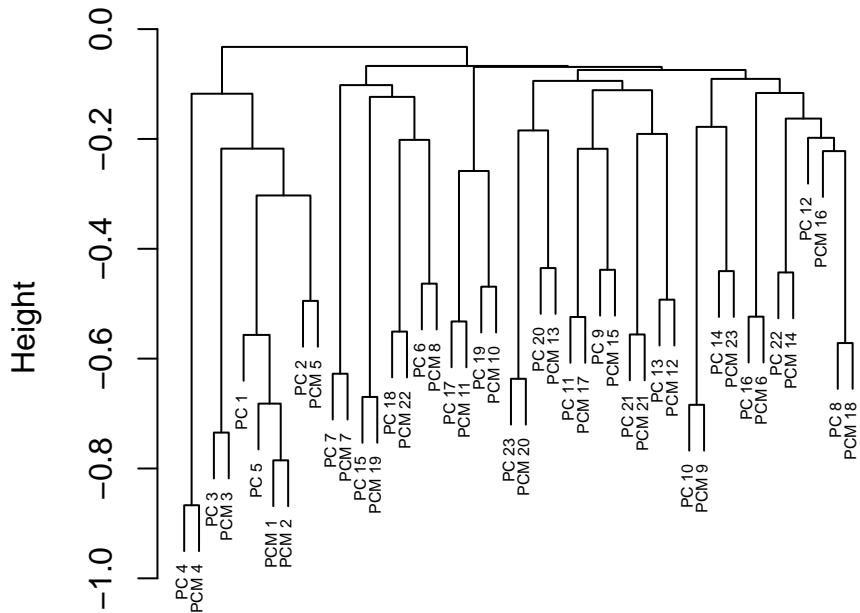

as.dist(-abs(cor(Z)))  
before re-labeling

### Cluster Dendrogram

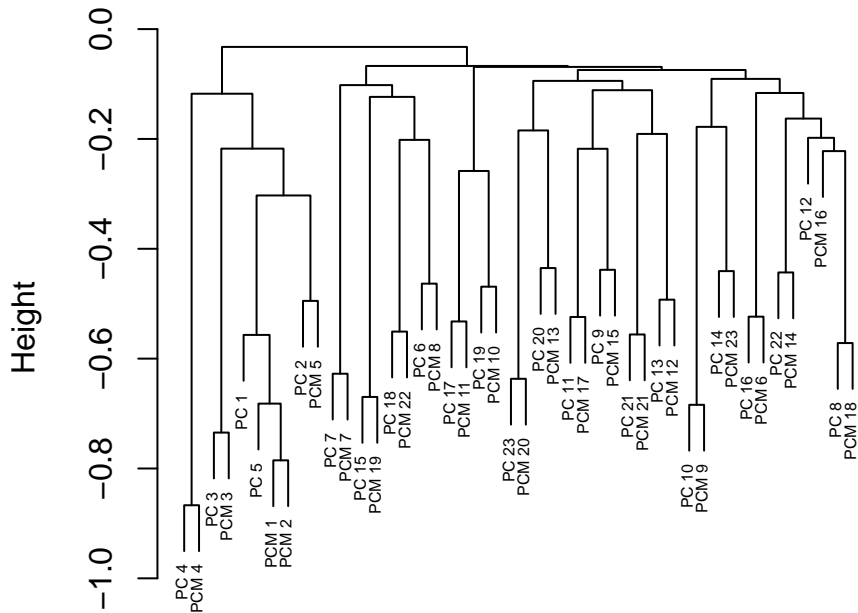

as.dist(-abs(cor(Z)))  
after re-labeling

### Cluster Dendrogram

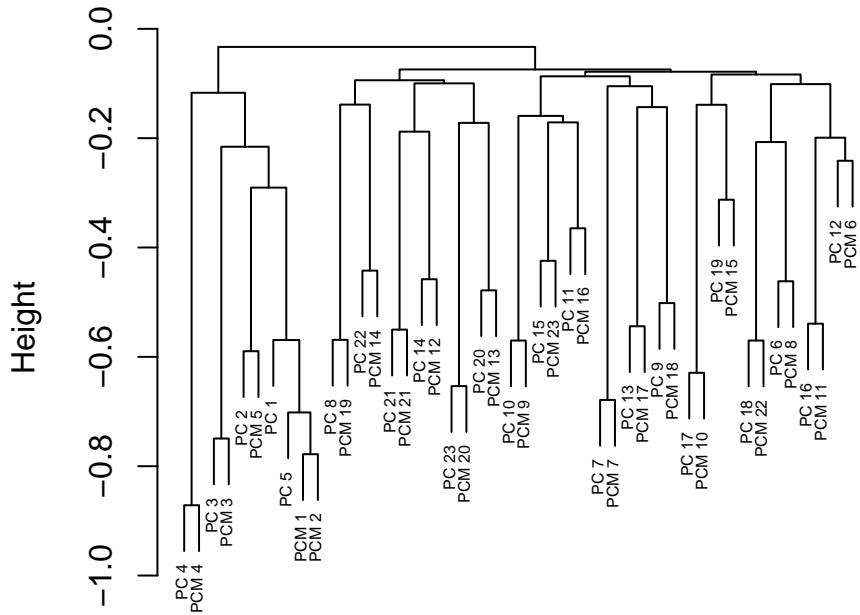

### Cluster Dendrogram

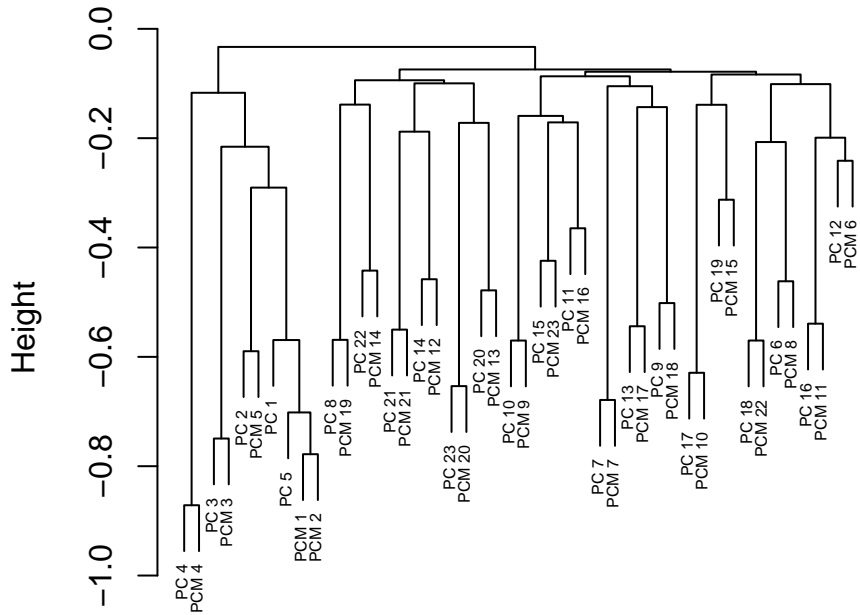

### Cluster Dendrogram

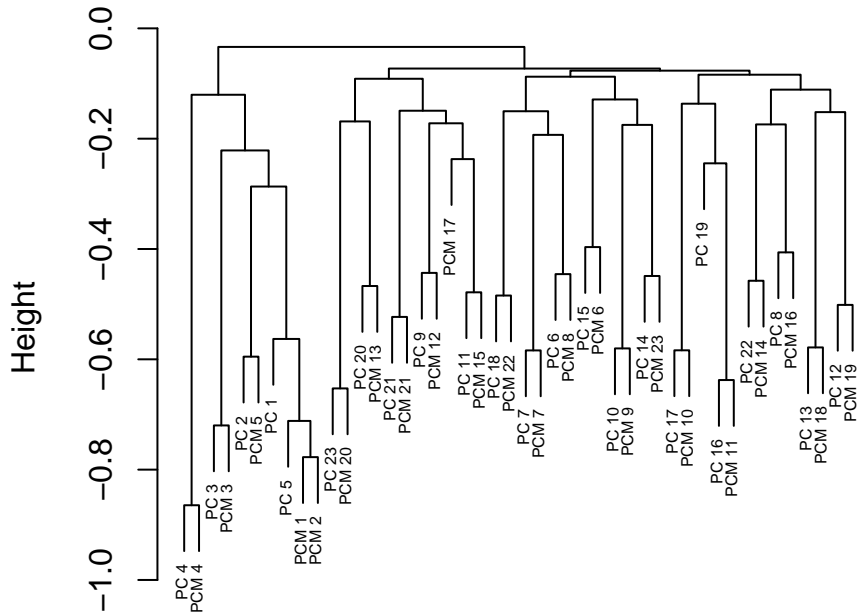

as.dist(-abs(cor(Z)))  
before re-labeling

### Cluster Dendrogram

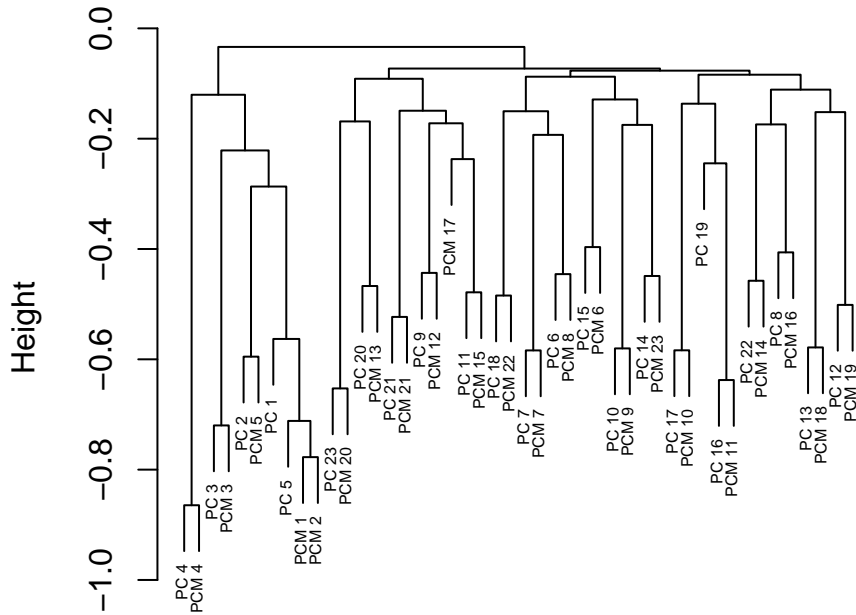

as.dist(-abs(cor(Z)))  
after re-labeling

### Cluster Dendrogram

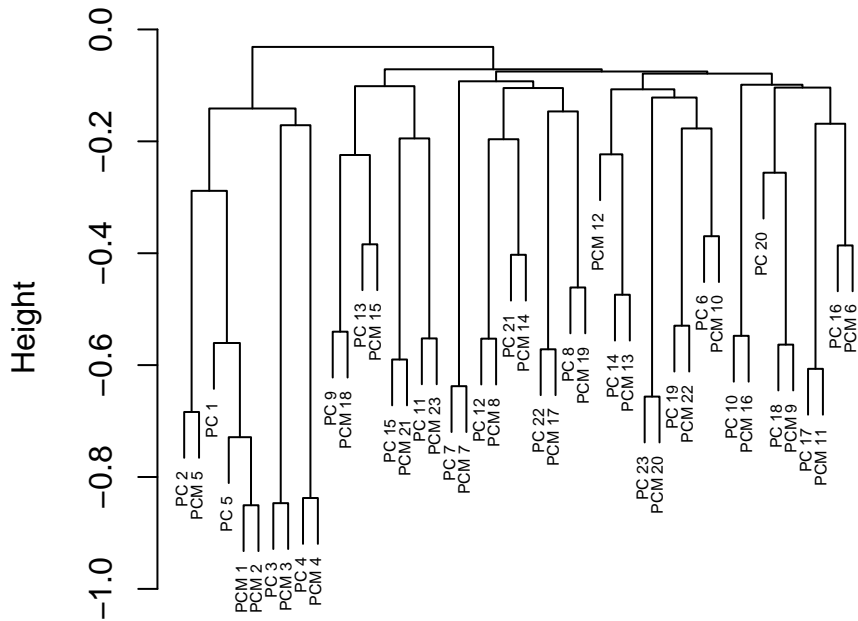

as.dist(-abs(cor(Z)))  
before re-labeling

### Cluster Dendrogram

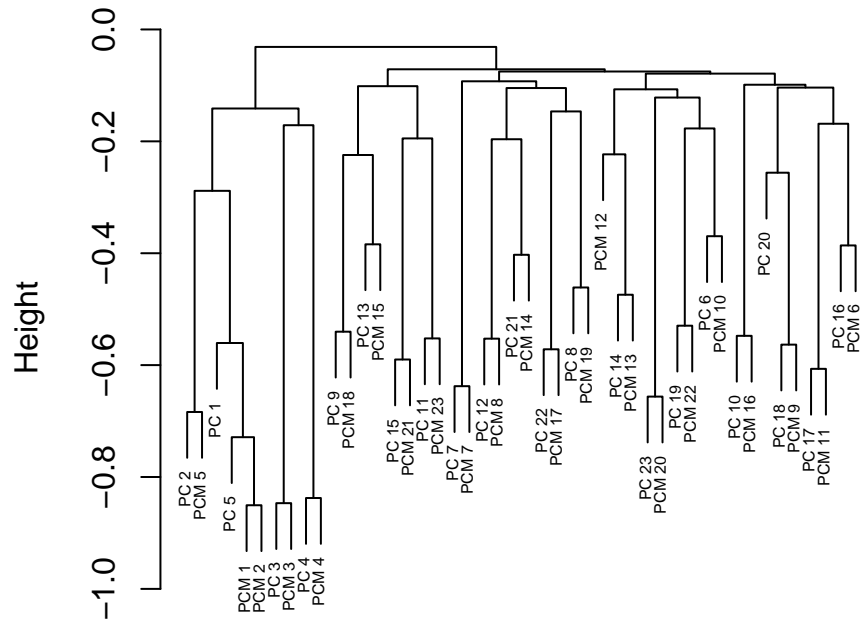

as.dist(-abs(cor(Z)))  
after re-labeling

### Cluster Dendrogram

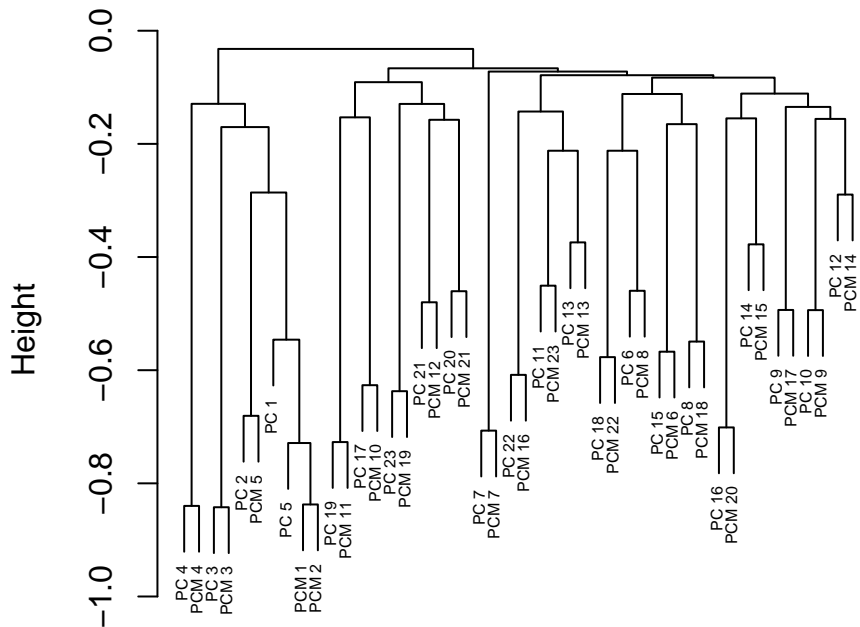

$as.dist(-abs(cor(Z)))$   
before re-labeling

### Cluster Dendrogram

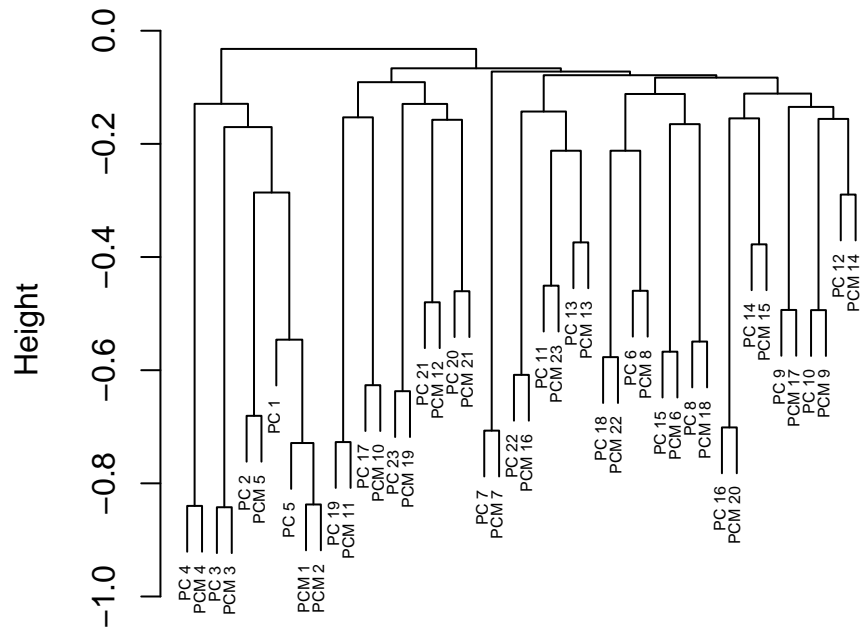

$as.dist(-abs(cor(Z)))$   
after re-labeling

### Cluster Dendrogram

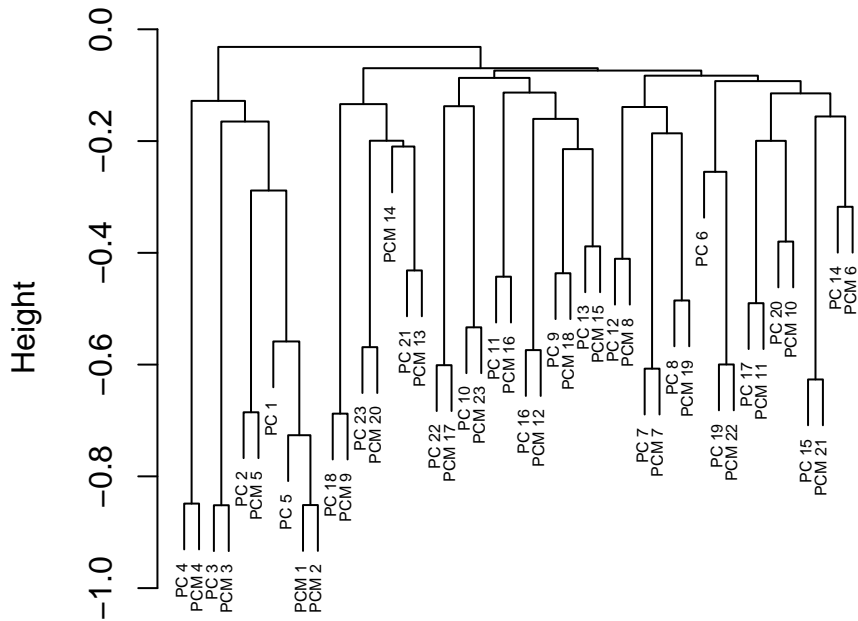

as.dist(-abs(cor(Z)))  
before re-labeling

### Cluster Dendrogram

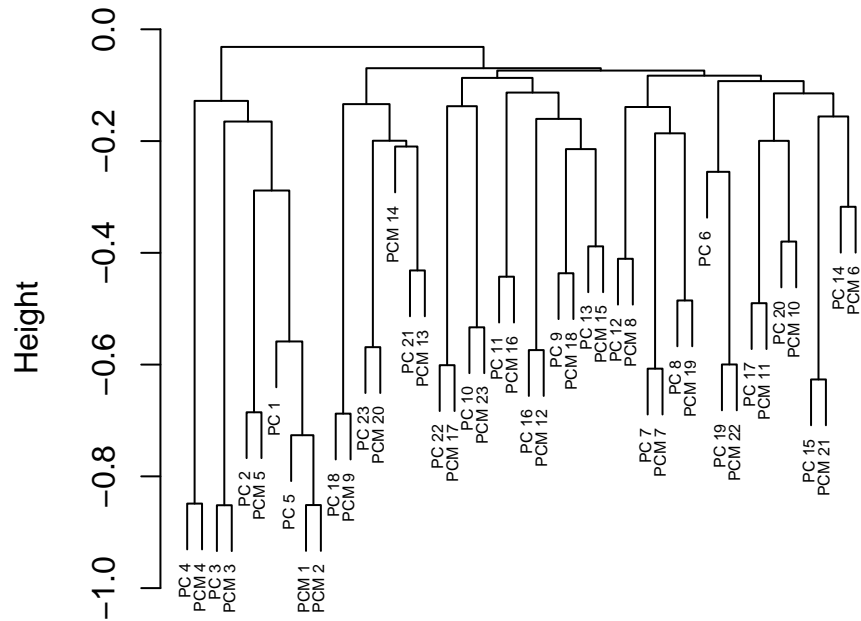

as.dist(-abs(cor(Z)))  
after re-labeling

### Cluster Dendrogram

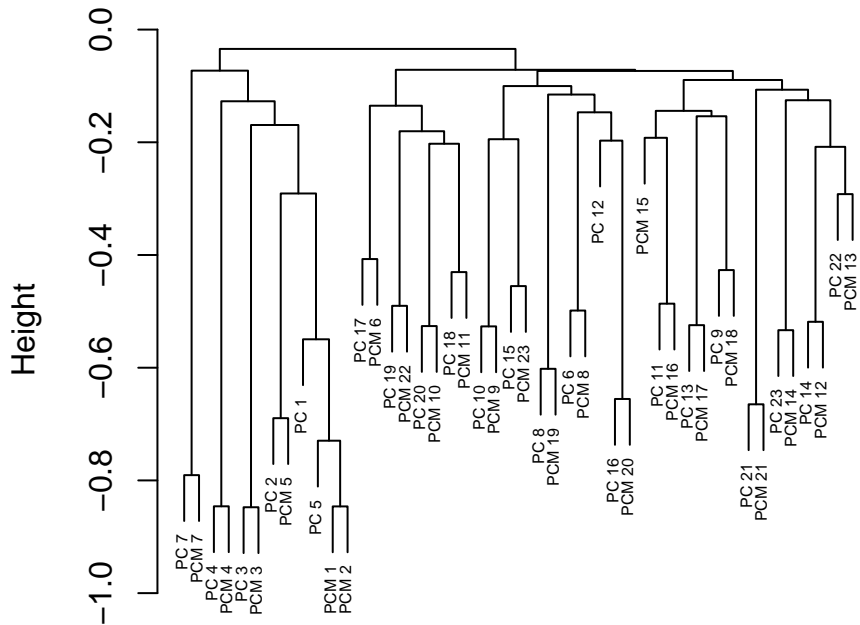

as.dist(-abs(cor(Z)))  
before re-labeling

### Cluster Dendrogram

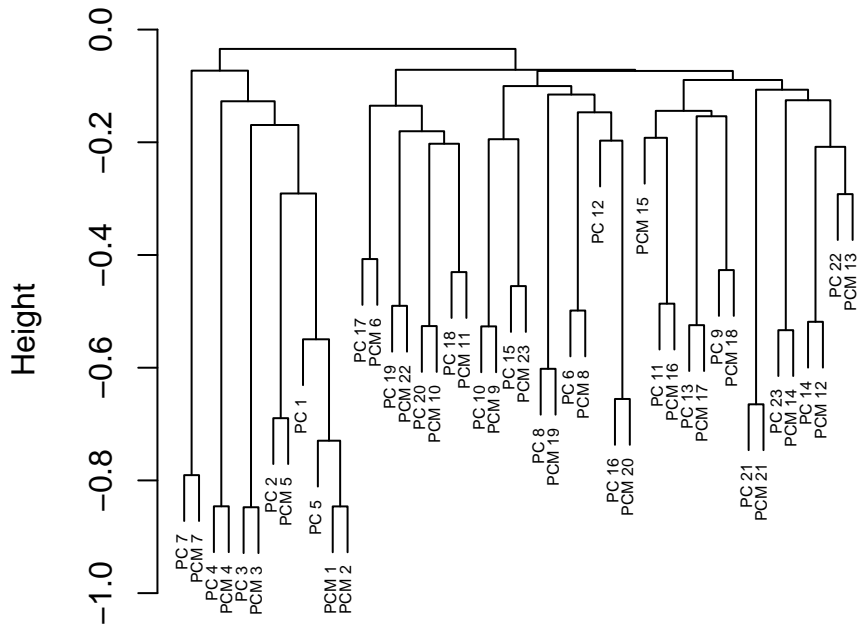

as.dist(-abs(cor(Z)))  
after re-labeling



### Cluster Dendrogram

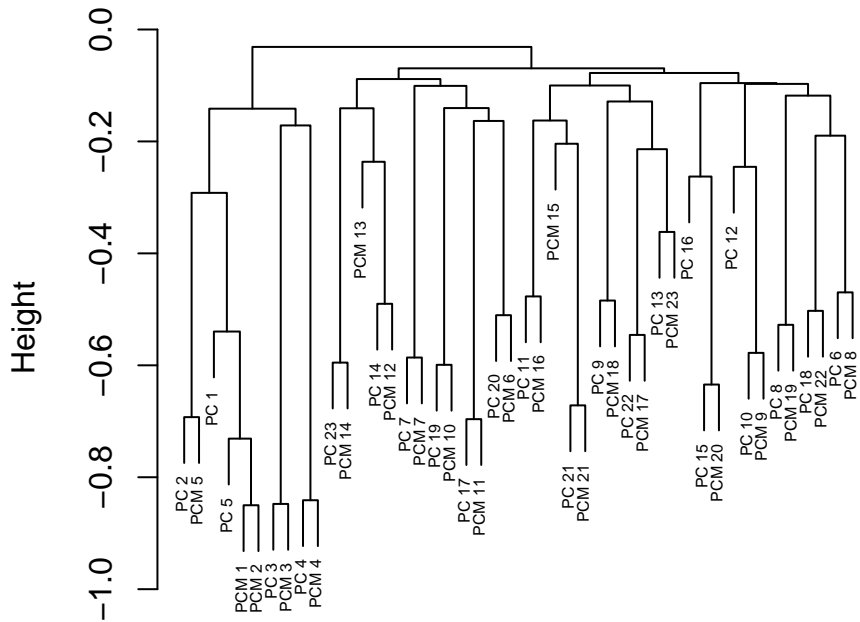

as.dist(-abs(cor(Z)))  
before re-labeling

### Cluster Dendrogram

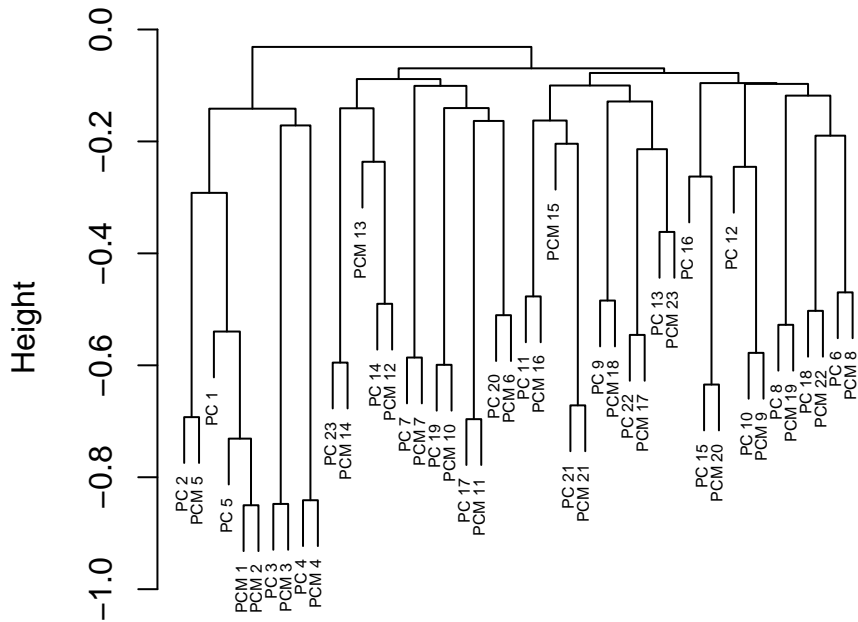

as.dist(-abs(cor(Z)))  
after re-labeling

### Cluster Dendrogram

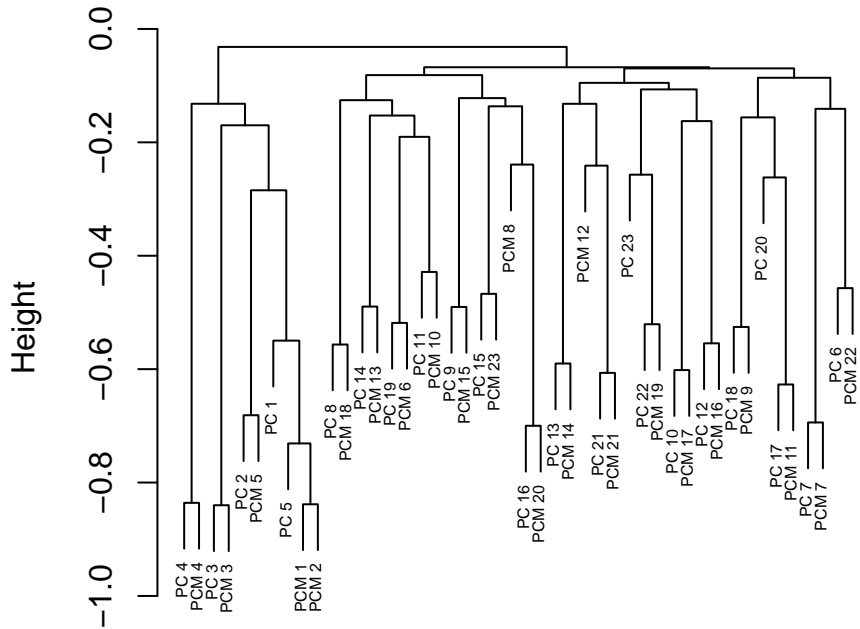

as.dist(-abs(cor(Z)))  
before re-labeling

### Cluster Dendrogram

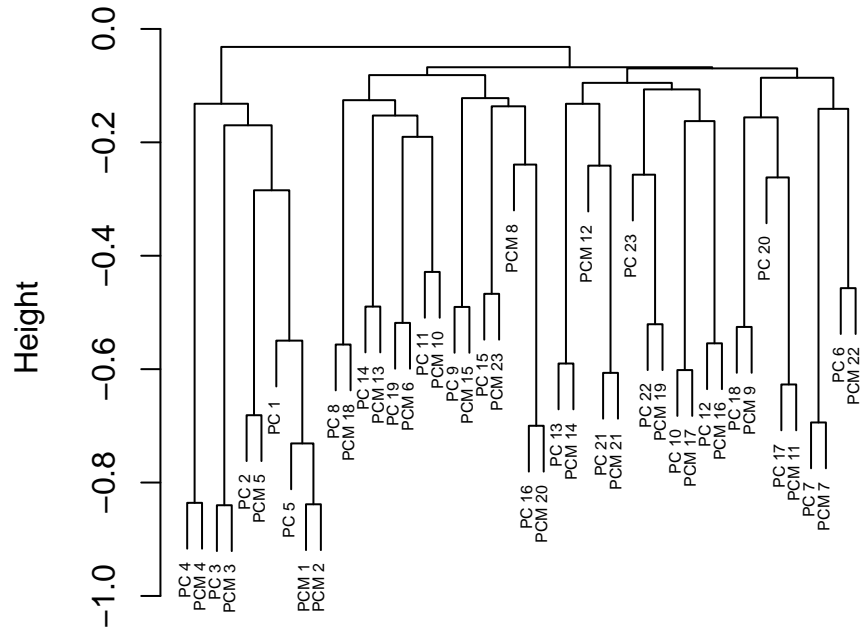

as.dist(-abs(cor(Z)))  
after re-labeling

### Cluster Dendrogram

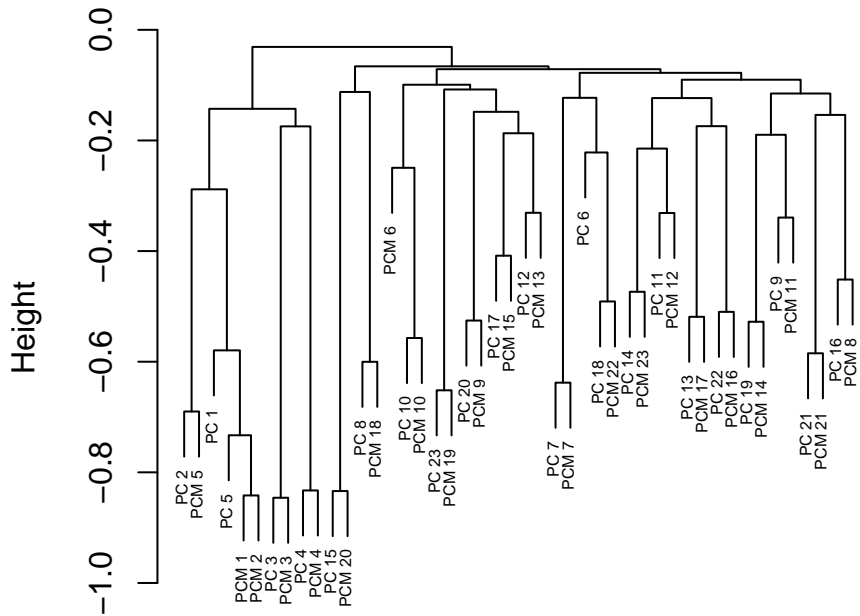

as.dist(-abs(cor(Z)))  
before re-labeling

### Cluster Dendrogram

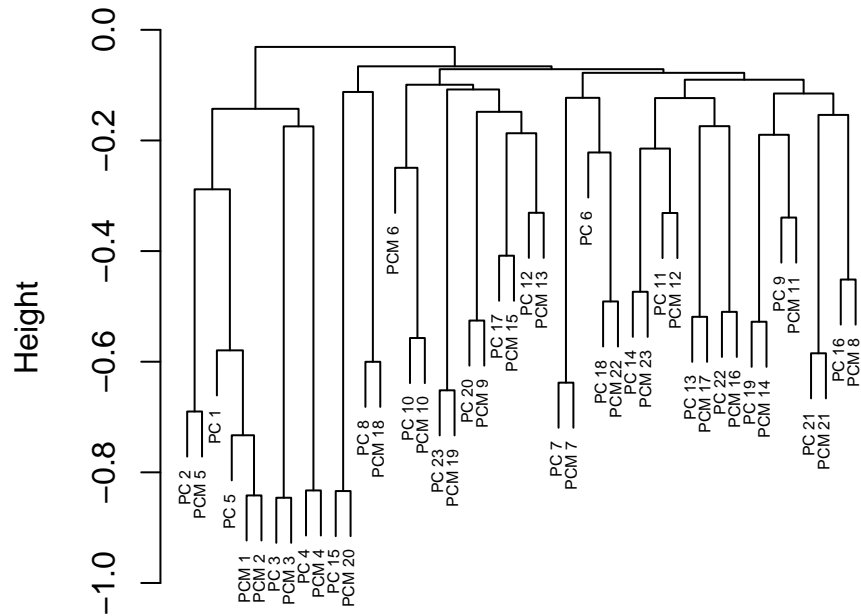

as.dist(-abs(cor(Z)))  
after re-labeling

### Cluster Dendrogram

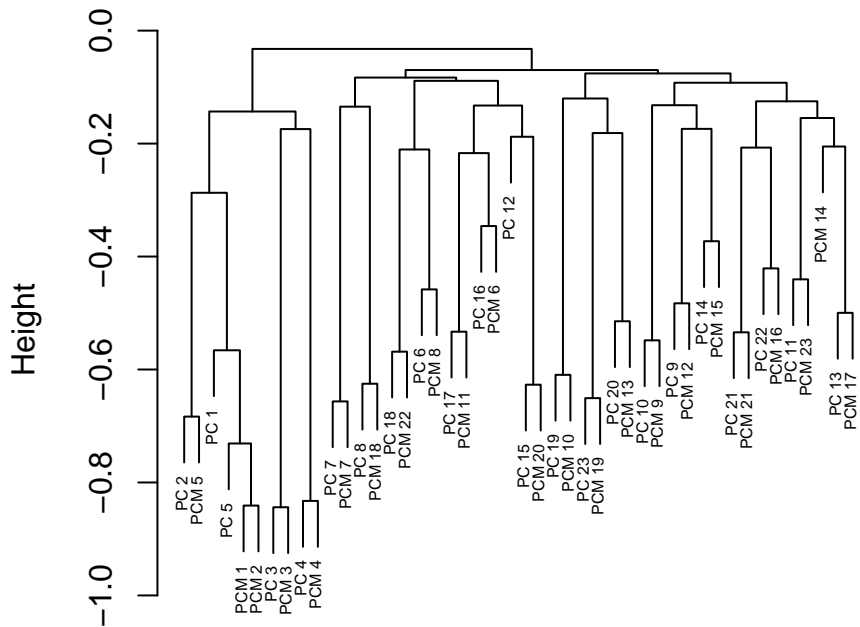

as.dist(-abs(cor(Z)))  
before re-labeling

### Cluster Dendrogram

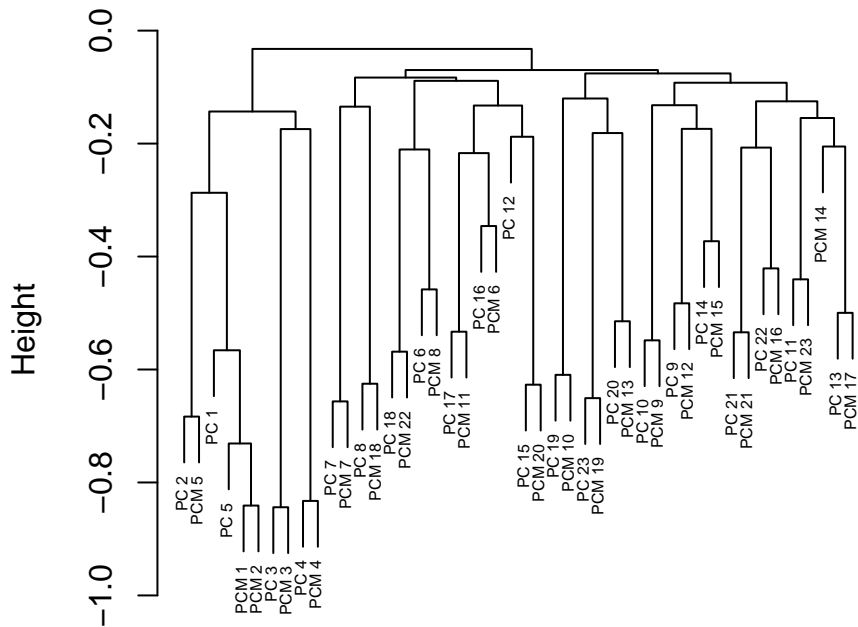

as.dist(-abs(cor(Z)))  
after re-labeling

### Cluster Dendrogram

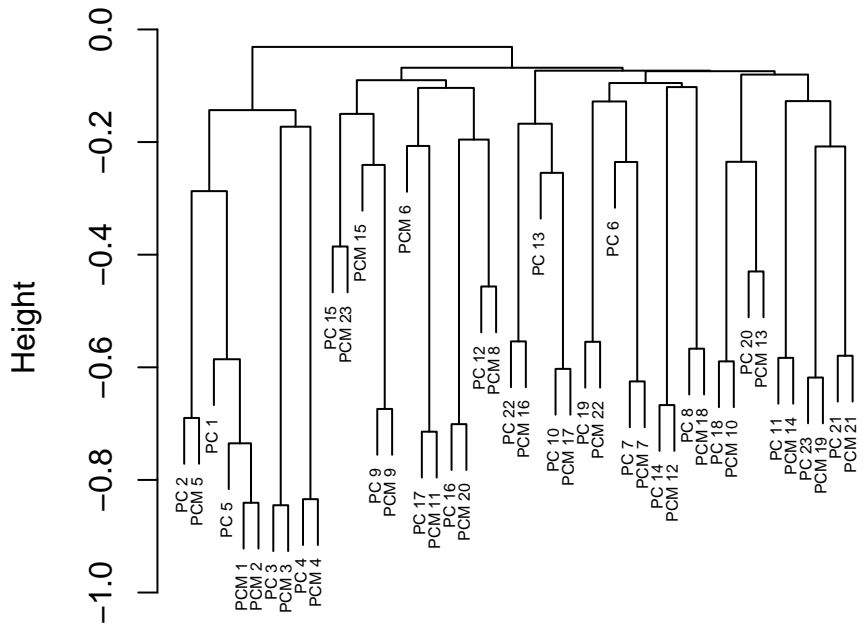

as.dist(-abs(cor(Z)))  
before re-labeling

### Cluster Dendrogram

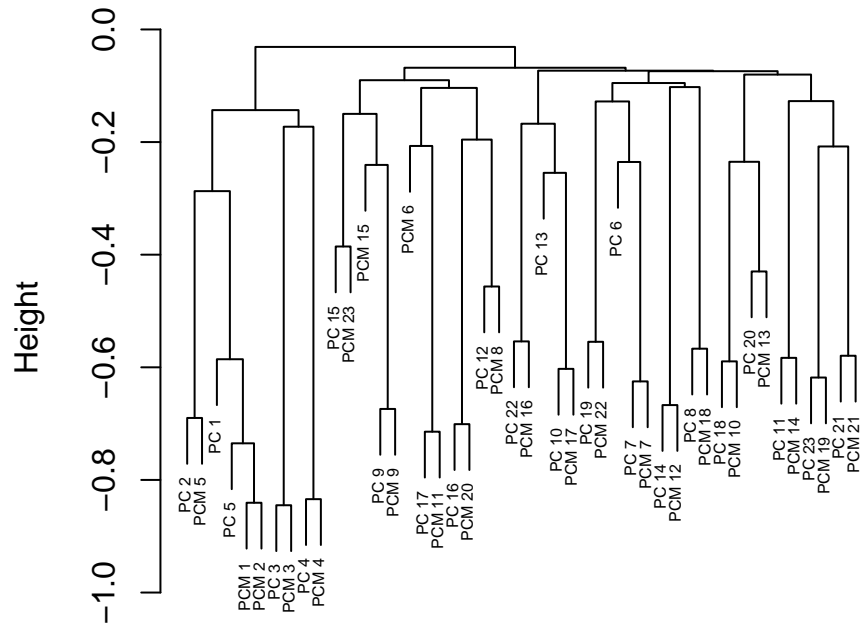

as.dist(-abs(cor(Z)))  
after re-labeling

### Cluster Dendrogram

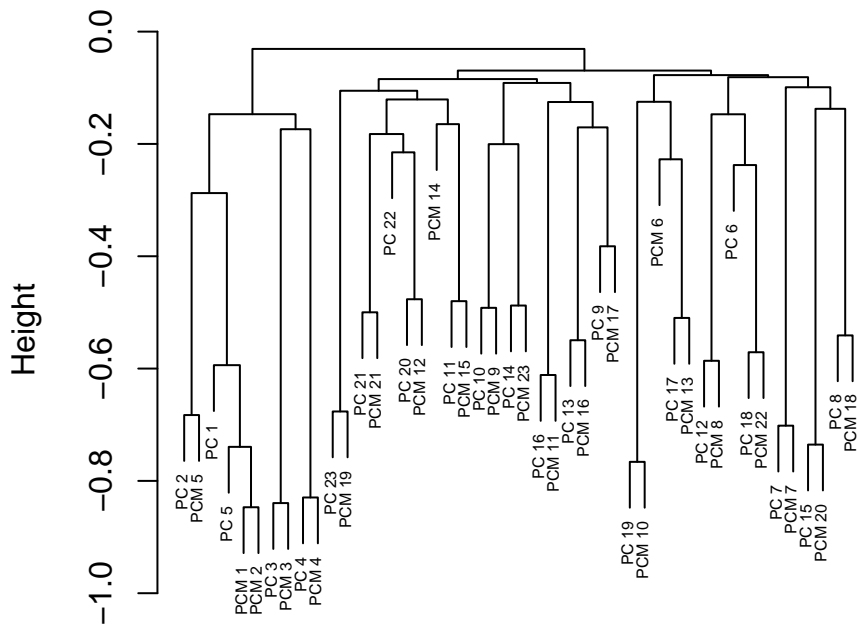

as.dist(-abs(cor(Z)))  
before re-labeling

### Cluster Dendrogram



as.dist(-abs(cor(Z)))  
after re-labeling

### Cluster Dendrogram

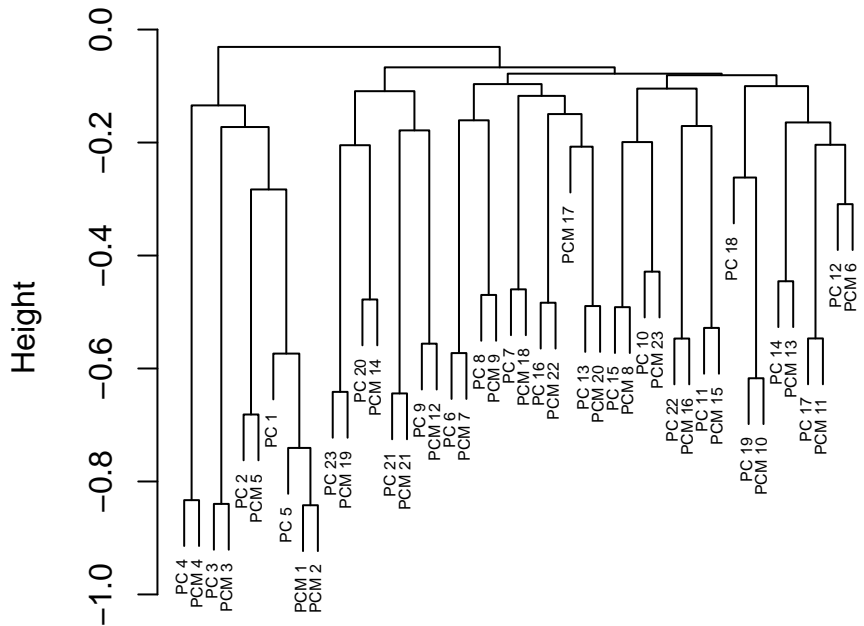

as.dist(-abs(cor(Z)))  
before re-labeling

### Cluster Dendrogram

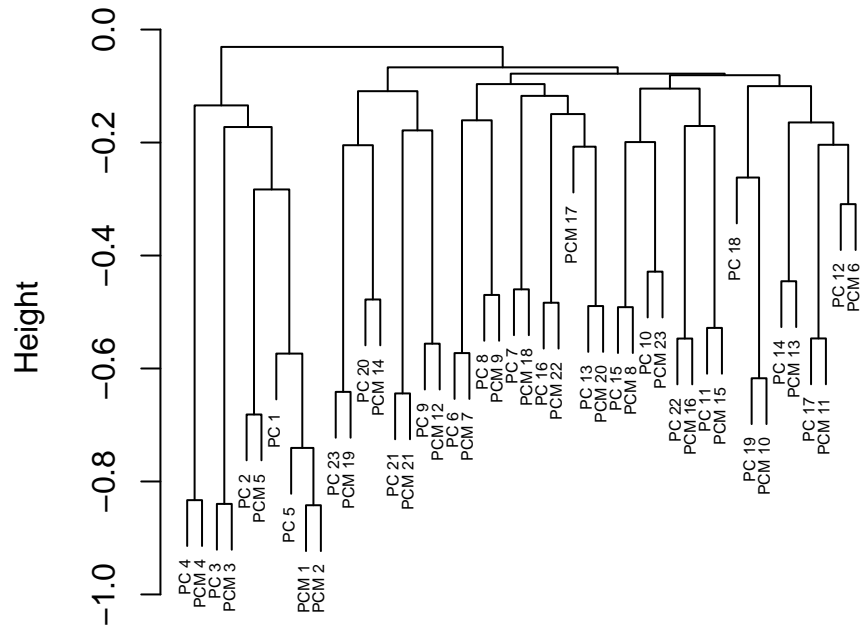

as.dist(-abs(cor(Z)))  
after re-labeling

### Cluster Dendrogram

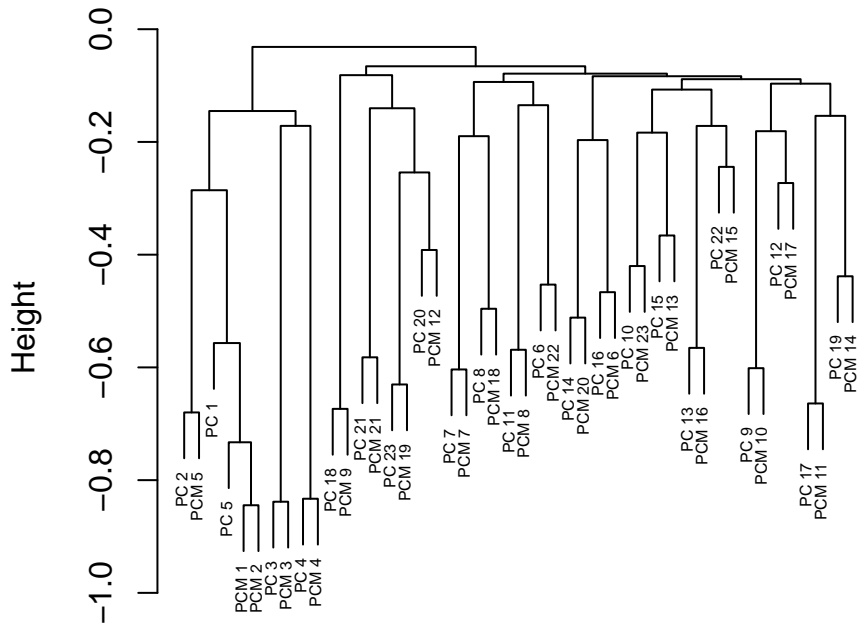

as.dist(-abs(cor(Z)))  
before re-labeling

### Cluster Dendrogram

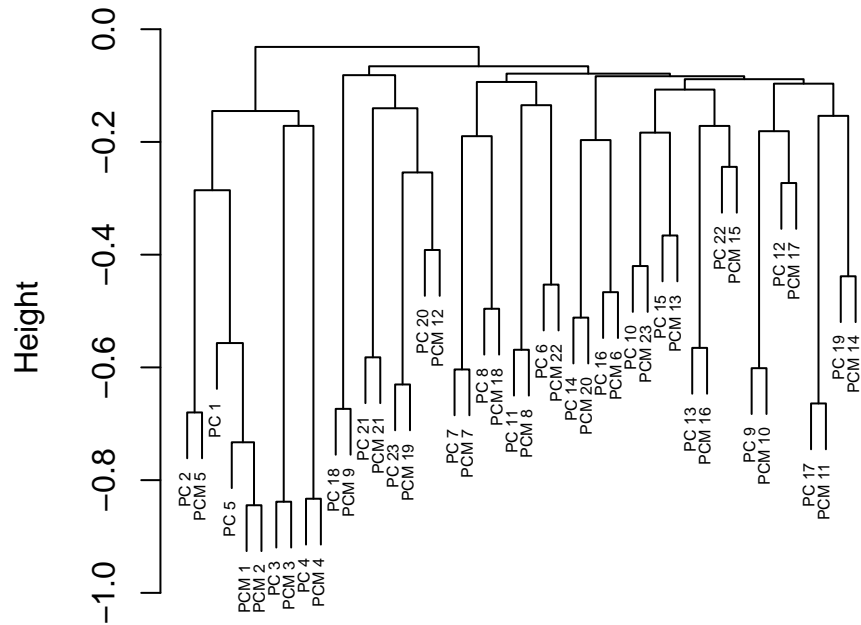

as.dist(-abs(cor(Z)))  
after re-labeling
