# Supplementary material for: SFRP1 is a possible candidate for epigenetic therapy in non-small cell lung cancer
Source: PubMed Central journal article supplement (PMC4989892; doi:10.1186/s12920-016-0196-3), 2016-08-12
Supplement: 12920_2016_196_MOESM6_ESM.pdf [file 12920_2016_196_MOESM6_ESM.pdf]

# Disease associations by gendoo server

## Categorical regression

### NM\_020436.2 SALL4

Plasmacytoma 0.00408

Lymphoma 0.0305

### NM\_002354.1 TACSTD1 (EPCAM)

Neoplasms 2.61e-21

Colorectal Neoplasms 1.00e-18

Adenocarcinoma 1.73e-15

Colonic Neoplasms 4.25e-14

Carcinoma 1.20e-13

Neoplastic Cells, Circulating 1.76e-13

Bone Marrow Neoplasms 3.00e-12

Lung Neoplasms 6.50e-10

Neoplasm Metastasis 1.02e-9

Breast Neoplasms 1.88e-9

Ovarian Neoplasms 2.81e-9

Stomach Neoplasms 3.32e-7

Lymphatic Metastasis 5.12e-7

Carcinoma, Squamous Cell 9.87e-7

Common Bile Duct Neoplasms 6.98e-5

Carcinoma, Non-Small-Cell Lung 0.000103

Head and Neck Neoplasms 0.000106

Carcinoma, Renal Cell 0.000175

Carcinoma, Signet Ring Cell 0.000179

Retinal Neoplasms 0.000260

Liver Neoplasms 0.000492

Kidney Neoplasms 0.000615

Neoplasms, Glandular and Epithelial 0.000857

Adenocarcinoma, Clear Cell 0.0012

Neoplasm Invasiveness 0.00189

Retinoblastoma 0.00193

Pancreatic Neoplasms 0.00212

Esophageal Neoplasms 0.00262

Prostatic Neoplasms 0.00655  
Carcinoma, Small Cell 0.0130  
Carcinoma, Papillary 0.0135  
Mouth Neoplasms 0.0185  
Neoplasms, Squamous Cell 0.0186  
Adenocarcinoma, Bronchiolo-Alveolar 0.01968  
Adenoma, Oxyphilic 0.0202  
Gallbladder Neoplasms 0.0313  
Carcinoma, Large Cell 0.0334  
Peritoneal Neoplasms 0.0396

### **NM\_001146.3 ANGPT1**

Liver Neoplasms 1.21e-109  
Glioblastoma 7.27e-7  
Astrocytoma 1.53e-6  
Brain Neoplasms 2.43e-6  
Carcinoma, Hepatocellular 6.44e-6  
Adenoma, Liver Cell 1.29e-5  
Mammary Neoplasms, Experimental 0.000256  
Kidney Neoplasms 0.000860  
Breast Neoplasms 0.00109  
Goiter 0.00113  
Adenocarcinoma 0.00320  
Skin Ulcer 0.00787  
Colonic Neoplasms 0.00908  
Colorectal Neoplasms 0.0140  
Ameloblastoma 0.0152  
Jaw Neoplasms 0.0168  
Carcinoma, Signet Ring Cell 0.0208  
Retinal Neoplasms 0.0250  
Gastrointestinal Stromal Tumors 0.0261  
Uveal Neoplasms 0.0271  
Neoplasm Metastasis 0.0316  
Esophageal Neoplasms 0.0356  
Carcinoma, Renal Cell 0.0362  
Ovarian Neoplasms 0.0413  
Peritoneal Neoplasms 0.0433  
Urinary Bladder Neoplasms 0.0454

### **NM\_002353.1 TACSTD2**

Adenocarcinoma 0.00398

Gallbladder Neoplasms 0.00782  
Carcinoma 0.0105  
Ovarian Neoplasms 0.0127  
Colorectal Neoplasms 0.0182  
Breast Neoplasms 0.0192  
Cell Transformation, Neoplastic 0.0207  
Mouth Neoplasms 0.0496

## **NM\_032880.2 IGSF21**

-----

## **NM\_004429.3 EFNB1**

Neoplasm Invasiveness 0.00801  
Adenocarcinoma, Scirrhus 0.000931  
Stomach Neoplasms 0.00804  
Intestinal Neoplasms 0.0100  
Rhabdomyosarcoma 0.0111  
Leukemia-Lymphoma, Adult T-Cell 0.0219  
Neoplasms 0.0336  
Osteosarcoma 0.0432

## **NM\_177524.1 MEST**

Carcinoma, Giant Cell 0.000303  
Lung Neoplasms 0.000323  
Carcinoma, Large Cell 0.00369  
Adenocarcinoma 0.00853  
Carcinoma, Small Cell 0.0185  
Breast Neoplasms 0.0255

## **NM\_013243.2 SCG3**

----

## **PC3**

## **NM\_001992.2 F2R**

Neoplasm Invasiveness 1.43e-8

Neoplasm Metastasis 7.95e-4  
Melanoma 9.42e-7  
Prostatic Neoplasms 2.73e-5  
Breast Neoplasms 0.000162  
Neoplasms 0.00506  
Colonic Neoplasms 0.00612  
Glioma 0.0156  
Carcinoma, Endometrioid 0.0245  
Adenocarcinoma, Clear Cell 0.0251  
Brain Neoplasms 0.0295  
Adenocarcinoma, Mucinous 0.0311

### **NM\_015881.5 DKK3 (dickkopf WNT signaling pathway inhibitor 3)**

Prostatic Neoplasms 1.33e-8  
Cell Transformation, Neoplastic 2.78e-6  
Lung Neoplasms 1.44e-5  
Urinary Bladder Neoplasms 6.34e-5  
Carcinoma, Non-Small-Cell Lung 0.000197  
Gastrointestinal Neoplasms 0.000222  
Carcinoma, Transitional Cell 0.000485  
Osteosarcoma 0.00125  
Neoplasm Invasiveness 0.00128  
Precursor Cell Lymphoblastic Leukemia-Lymphoma 0.00162  
Carcinoma, Renal Cell 0.00208  
Ganglioneuroma 0.00266  
Glioma 0.00397  
Kidney Neoplasms 0.00400  
Carcinoma, Neuroendocrine 0.00444  
Neuroblastoma 0.00634  
Neoplasms, Germ Cell and Embryonal 0.00990  
Carcinoma 0.0105  
Melanoma 0.0110  
Colorectal Neoplasms 0.0182  
Testicular Neoplasms 0.0256  
Lymphoma, Non-Hodgkin 0.0286  
Adenocarcinoma 0.0405  
Carcinoma, Small Cell 0.0414

### **NM\_003012.3 SFRP1**

Colorectal Neoplasms 1.57e-8

Carcinoma, Renal Cell 3.70e-7  
Kidney Neoplasms 1.87e-6  
Breast Neoplasms 3.43e-6  
Cell Transformation, Neoplastic 8.26e-6  
Urinary Bladder Neoplasms 2.26e-5  
Adenoma 7.18e-5  
Esophageal Neoplasms 0.000402  
Adenocarcinoma 0.000604  
Carcinoma, Hepatocellular 0.00117  
Liver Neoplasms 0.00177  
Carcinoma, Transitional Cell 0.00216  
Pancreatic Neoplasms 0.00280  
Carcinoma 0.00442  
Precancerous Conditions 0.00496  
Neoplasms 0.00587  
Urologic Neoplasms 0.00853  
Uterine Cervical Neoplasms 0.00885  
Leukemia, Myeloid, Acute 0.0101  
Hepatoblastoma 0.0159  
Sarcoma, Ewing 0.0299  
Leiomyoma 0.0306  
Carcinoma in Situ 0.0387  
Stomach Neoplasms 0.0444

## **NM\_213606.1 SLC16A12**

----

## **NM\_019102.2 HOXA5**

Breast Neoplasms 7.69e-13  
Papilloma, Intraductal 0.000621  
Leukemia, Myeloid, Acute 0.00171  
Leukemia, Myeloid 0.00196  
Pulmonary Emphysema 0.00333  
Hemangioma 0.00413  
Precursor B-Cell Lymphoblastic Leukemia-Lymphoma 0.00647  
Leukemia, Lymphoid 0.00972  
Cell Transformation, Neoplastic 0.0153  
Carcinoma, Ductal, Breast 0.0340  
Leukemia, Myelogenous, Chronic, BCR-ABL Positive 0.0394  
Precursor Cell Lymphoblastic Leukemia-Lymphoma 0.0490

## **NM\_004321.4 KIF1A**

----

## **NM\_004893.2 H2AFY**

Cerebellar Neoplasms 0.000657

Medulloblastoma 0.000950

## **NM\_005176.4 ATP5G2**

-----

## **NM\_014220.2 TM4SF1**

Colorectal Neoplasms 7.62e-5

Neoplasm Invasiveness 8.56e-5

Lung Neoplasms 0.000260

Neoplasms 0.000330

Neoplasm Metastasis 0.00179

Adenocarcinoma 0.00743

Carcinoma, Renal Cell 0.0272

Neoplasm Recurrence, Local 0.0283

Kidney Neoplasms 0.0378

Carcinoma, Non-Small-Cell Lung 0.0450

## **NM\_201525.1 GPR56**

See below, PC4

## **NM\_005980.2 S100P (calcium binding protein P)**

Pancreatic Neoplasms 3.33e-12

Adenocarcinoma 3.53e-9

Neoplasm Metastasis 2.84e-8

Carcinoma, Pancreatic Ductal 1.05e-6

Prostatic Neoplasms 1.08e-6

Neoplasms 4.78e-5

Carcinoma in Situ 0.000230

Breast Neoplasms 0.000535

Ovarian Neoplasms 0.00109  
Colonic Neoplasms 0.00130  
Neoplasm Invasiveness 0.00206  
Urologic Neoplasms 0.00475  
Lung Neoplasms 0.00590  
Gastrointestinal Stromal Tumors 0.00697  
Carcinoma, Non-Small-Cell Lung 0.00755  
Mammary Neoplasms, Animal 0.0134  
Carcinoma 0.0144  
Tumor Virus Infections 0.0145  
Adenocarcinoma, Mucinous 0.0182  
Cell Transformation, Neoplastic 0.0281  
Carcinoma, Transitional Cell 0.0369  
Carcinoma, Ductal, Breast 0.0464  
Carcinoma, Papillary 0.0494

## **PC4**

### **NM\_021102.2 SPINT2**

Ovarian Neoplasms 1.02e-22  
Neoplasm Invasiveness 6.55e-14  
Peritoneal Neoplasms 7.13e-6  
Carcinoma, Hepatocellular 0.000140  
Neoplasms 0.000237  
Neoplasm Metastasis 0.000251  
Kidney Neoplasms 0.000387  
Brain Neoplasms 0.00136  
Liver Neoplasms 0.00187  
Carcinoma, Renal Cell 0.00189  
Ureteral Neoplasms 0.00521  
Carcinoma 0.0185  
Chondrosarcoma 0.0259  
Lung Neoplasms 0.0264  
Sarcoma, Kaposi 0.0364  
Adenocarcinoma, Clear Cell 0.0440  
Glioma 0.0445

### **NM\_002354.1 EPCAM**

(see categorical regression)

## NM\_004360.2 CDH1

Stomach Neoplasms 8.67e-150  
Neoplasm Invasiveness 3.48e-67  
Breast Neoplasms 1.06e-42  
Lymphatic Metastasis 2.79e-37  
Adenocarcinoma 8.70e-36  
Carcinoma, Signet Ring Cell 1.39e-36  
Carcinoma, Squamous Cell 1.32e-24  
Neoplasm Metastasis 1.12e-21  
Colorectal Neoplasms 1.24e-21  
Carcinoma 1.30e-21  
Carcinoma, Lobular 2.84e-21  
Prostatic Neoplasms 1.03e-18  
Colonic Neoplasms 1.14e-16  
Urinary Bladder Neoplasms 3.79e-12  
Carcinoma, Ductal, Breast 1.34e-11  
Carcinoma in Situ 2.33e-10  
Neoplasm Recurrence, Local 2.82e-10  
Neoplastic Syndromes, Hereditary 6.33e-10  
Neoplasms 8.77e-9  
Carcinoma, Transitional Cell 1.55e-8  
Esophageal Neoplasms 2.96e-8  
Adenoma 1.75e-7  
Liver Neoplasms 2.18e-7  
Lung Neoplasms 2.89e-7  
Carcinoma, Non-Small-Cell Lung 3.20e-6  
Rectal Neoplasms 4.00e-6  
Gallbladder Neoplasms 4.21e-6  
Carcinoma, Hepatocellular 8.13e-6  
Pancreatic Neoplasms 1.26e-5  
Ovarian Neoplasms 2.24e-5  
Carcinoma, Papillary 2.76e-5  
Carcinoma, Ductal 2.94e-5  
Uterine Cervical Neoplasms 3.41e-5  
Carcinoma, Adenoid Cystic 5.48e-5  
Skin Neoplasms 5.60e-5  
Thyroid Neoplasms 6.54e-5  
Head and Neck Neoplasms 0.000148  
Cell Transformation, Neoplastic 0.000217  
Melanoma 0.000303  
Mucoepidermoid Tumor 0.000533  
Mouth Neoplasms 0.000633  
Carcinoma, Intraductal, Noninfiltrating 0.000668



Salivary Gland Neoplasms 0.000680  
Cervical Intraepithelial Neoplasia 0.000699  
Adenocarcinoma, Follicular 0.000745  
Meningioma 0.00135  
Carcinoma, Pancreatic Ductal 0.00137  
Carcinoma, Adenosquamous 0.00179  
Plasma Cell Granuloma, Pulmonary 0.00213  
Vulvar Neoplasms 0.00224  
Sarcoma, Synovial 0.00325  
Carcinoma, Large Cell 0.00562  
Pulmonary Sclerosing Hemangioma 0.00638  
Carcinoma, Verrucous 0.00849  
Pseudomyxoma Peritonei 0.00955  
Neoplasms, Neuroepithelial 0.0117  
Meningeal Neoplasms 0.0124  
Adenoma, Villous 0.0132  
Pinealoma 0.0138  
Neoplasms, Multiple Primary 0.0155  
Adenocarcinoma, Mucinous 0.0183  
Ureteral Neoplasms 0.0190  
Choroid Plexus Neoplasms 0.0190  
Gingival Neoplasms 0.0200  
Spinal Cord Neoplasms 0.0289  
Hypopharyngeal Neoplasms 0.0289  
Laryngeal Neoplasms 0.0331  
Gastrointestinal Neoplasms 0.0334  
Endometrial Neoplasms 0.0344  
Bronchial Neoplasms 0.0361  
Kidney Neoplasms 0.0363  
Duodenal Neoplasms 0.0366  
Carcinoma, Mucoepidermoid 0.0382  
Biliary Tract Neoplasms 0.0459  
Testicular Neoplasms 0.0464  
Pituitary Neoplasms 0.0475  
Carcinoma, Papillary, Follicular 0.0479

## **NM\_002353.1 TACSTD2**

(see categorical regression)

## **NM\_005562.1 LAMC2**

Carcinoma, Squamous Cell 2.51e-43

Neoplasm Invasiveness 3.00e-36  
Mouth Neoplasms 5.60e-14  
Tongue Neoplasms 1.49e-13  
Adenocarcinoma 1.27e-11  
Neoplasm Recurrence, Local 4.53e-11  
Colorectal Neoplasms 6.48e-10  
Neoplasm Metastasis 2.05e-8  
Esophageal Neoplasms 5.30e-8  
Lymphatic Metastasis 1.19e-6  
Adenocarcinoma, Clear Cell 7.60e-6  
Precancerous Conditions 1.45e-5  
Head and Neck Neoplasms 2.90e-5  
Cervical Intraepithelial Neoplasia 0.000672  
Uterine Cervical Neoplasms 0.00100  
Carcinoma, Pancreatic Ductal 0.00107  
Stomach Neoplasms 0.00123  
Fibrosarcoma 0.00167  
Lung Neoplasms 0.00227  
Skin Neoplasms 0.00611  
Anus Neoplasms 0.00611  
Pancreatic Neoplasms 0.00682  
Carcinoma, Small Cell 0.00692  
Carcinoma 0.0106  
Endometrial Neoplasms 0.0108  
Neoplasms, Squamous Cell 0.0133  
Carcinoma, Adenosquamous 0.0135  
Vulvar Neoplasms 0.0151  
Carcinoma, Adenoid Cystic 0.0156  
Uveal Neoplasms 0.0179  
Urinary Bladder Neoplasms 0.0210  
Carcinoma, Large Cell 0.0241  
Neoplasms, Glandular and Epithelial 0.0299  
Carcinoid Tumor 0.0331  
Liver Neoplasms 0.0338  
Cholangiocarcinoma 0.0372  
Bile Duct Neoplasms 0.0410  
Carcinoma, Non-Small-Cell Lung 0.0424

## **NM\_145899.1 HMGA1**

Breast Neoplasms 2.03e-6  
Cell Transformation, Neoplastic 8.98e-5  
Neuroblastoma 0.000278

Pancreatic Neoplasms 0.000372  
Ganglioneuroblastoma 0.000857  
Ganglioneuroma 0.000282  
Hamartoma 0.00449  
Adenocarcinoma 0.00468  
Genital Neoplasms, Female 0.00572  
Neoplasms, Germ Cell and Embryonal 0.0105  
Neoplasm Metastasis 0.0116  
Carcinoma 0.0117  
Adenocarcinoma, Follicular 0.0138  
Leiomyoma 0.0154  
Carcinoma, Pancreatic Ductal 0.0170  
Neoplasm Invasiveness 0.0216  
Testicular Neoplasms 0.0270  
Uterine Neoplasms 0.0357  
Carcinoma, Ductal, Breast 0.0421  
Carcinoma, Papillary 0.0446  
Neoplasms 0.0498

### **NM\_005558.3 LAD1**

-----

### **NM\_201525.1 GPR56**

Neoplasm Metastasis 0.00154  
Melanoma 0.00163  
Esophageal Neoplasms 0.0251  
Glioblastoma 0.0256  
Glioma 0.0350  
Pancreatic Neoplasms 0.0489

### **NM\_004566.2 PFKFB3**

Neoplasms 4.47e-9  
Pancreatic Neoplasms 0.00151  
Cell Transformation, Neoplastic 0.0042  
Astrocytoma 0.0184  
Breast Neoplasms 0.0255  
Carcinoma, Renal Cell 0.0291  
Glioblastoma 0.0295  
Kidney Neoplasms 0.0404

### **NM\_005218.3 DEFB1**

Carcinoma, Renal Cell 4.49e-5  
Adenoma, Oxyphilic 9.96e-5  
Kidney Neoplasms 0.000161  
Fibroma 0.0103  
Adenoma, Pleomorphic 0.0138  
Carcinoma, Adenoid Cystic 0.0152  
Plasmacytoma 0.0164  
Carcinoma, Squamous Cell 0.0347  
Adenocarcinoma, Clear Cell 0.0351  
Salivary Gland Neoplasms 0.0356  
Cholangiocarcinoma 0.0365  
Prostatic Neoplasms 0.0492

### **NM\_002727.2 SRGN**

Leukemia, Promyelocytic, Acute 4.87e-5  
Leukemia, Myeloid, Acute 0.000194  
Multiple Myeloma 0.0188  
Leukemia 0.0255

### **NM\_004181.3 UCHL1**

Carcinoma, Renal Cell 1.74e-7  
Kidney Neoplasms 8.88e-7  
Granular Cell Tumor 0.00346  
Digestive System Neoplasms 0.00544  
Colorectal Neoplasms 0.00649  
Neoplasm Metastasis 0.0323

### **NM\_000691.3 ALDH3A1**

Lung Neoplasms 3.04e-5  
Mouth Neoplasms 0.00417  
Breast Neoplasms 0.00434  
Neoplasms, Germ Cell and Embryonal 0.00584  
Adenocarcinoma 0.0150  
Carcinoma, Small Cell 0.0246  
Neoplasm Recurrence, Local 0.0403

## **NM\_012307.2 EPB41L3**

Meningioma 2.41e-23  
Meningeal Neoplasms 1.17e-12  
Lung Neoplasms 3.24e-10  
Carcinoma, Non-Small-Cell Lung 8.60e-10  
Breast Neoplasms 6.88e-7  
Spinal Cord Neoplasms 1.95e-6  
Ependymoma 1.00e-5  
Neurilemmoma 1.50e-5  
Neoplasm Metastasis 0.000377  
Neurofibromatosis 2 0.00243  
Brain Neoplasms 0.00645  
Carcinoma 0.00879  
Central Nervous System Neoplasms 0.00882  
Intestinal Neoplasms 0.0107  
Prostatic Neoplasms 0.0281  
Astrocytoma 0.0377

## **NM\_021136.2 RTN1**

Lung Neoplasms 2.76e-9  
Carcinoma, Small Cell 3.21e-9  
Neuroendocrine Tumors 8.60e-9  
Carcinoma, Neuroendocrine 1.78e-6  
Carcinoid Tumor 1.21e-5  
Carcinoma, Non-Small-Cell Lung 1.56e-5  
Neuroblastoma 0.00124  
Neuroectodermal Tumors, Primitive, Peripheral 0.00184  
Adenoma, Islet Cell 0.00196  
Carcinoma, Squamous Cell 0.00527  
Adenocarcinoma 0.00853  
Adrenal Gland Neoplasms 0.0137  
Pheochromocytoma 0.0164  
Thyroid Neoplasms 0.0431

## **NM\_005559.2 LAMA1**

Choriocarcinoma 2.63e-12  
Fibrosarcoma 1.23e-5  
Uterine Neoplasms 5.78e-5  
Carcinoma, Adenoid Cystic 6.31e-5  
Salivary Gland Neoplasms 0.000350

Carcinoma 0.00442  
Myoepithelioma 0.00487  
Adenoma, Oxyphilic 0.0106  
Choristoma 0.0120  
Neurilemmoma 0.0129  
Tongue Neoplasms 0.0164  
Glioma 0.0169  
Kidney Neoplasms 0.0170  
Lung Neoplasms 0.0288  
Wilms Tumor 0.0301  
Brain Neoplasms 0.0319  
Meningioma 0.0336  
Gastrointestinal Neoplasms 0.0447
